# Supplementary material for: Validating a clinical laboratory parameter-based deisolation algorithm for patients with COVID-19 in the intensive care unit using viability PCR: the CoLaIC multicentre cohort study protocol
Source: PubMed Central journal article supplement — BMJ Open. 2023 Feb 28;13(2):e069455. doi: 10.1136/bmjopen-2022-069455 (PMC9979582; doi:10.1136/bmjopen-2022-069455), 2023-02-28
Supplement: bmjopen-2022-069455.draft_revisions.pdf [file bmjopen-2022-069455.draft_revisions.pdf]

# BMJ Open

BMJ Open is committed to open peer review. As part of this commitment we make the peer review history of every article we publish publicly available.

When an article is published we post the peer reviewers' comments and the authors' responses online. We also post the versions of the paper that were used during peer review. These are the versions that the peer review comments apply to.

The versions of the paper that follow are the versions that were submitted during the peer review process. They are not the versions of record or the final published versions. They should not be cited or distributed as the published version of this manuscript.

BMJ Open is an open access journal and the full, final, typeset and author-corrected version of record of the manuscript is available on our site with no access controls, subscription charges or pay-per-view fees (<http://bmjopen.bmj.com>).

If you have any questions on BMJ Open's open peer review process please email [info.bmjopen@bmj.com](mailto:info.bmjopen@bmj.com)

# BMJ Open

## Validating a clinical laboratory parameters-based de-isolation algorithm for COVID-19 patients in the intensive care unit using viability- PCR: the CoLaIC study protocol

|                               |                                                                                                                                                                                                                                                                                                                                                                                                                                                                                                                                                                                                                                                                                                                                                                                                                                                                                                                                                                                                                                                                                                                                                                                                                                                                                                                                                                                                                                                                                                                                                                                                                                                                                                                                                           |
|-------------------------------|-----------------------------------------------------------------------------------------------------------------------------------------------------------------------------------------------------------------------------------------------------------------------------------------------------------------------------------------------------------------------------------------------------------------------------------------------------------------------------------------------------------------------------------------------------------------------------------------------------------------------------------------------------------------------------------------------------------------------------------------------------------------------------------------------------------------------------------------------------------------------------------------------------------------------------------------------------------------------------------------------------------------------------------------------------------------------------------------------------------------------------------------------------------------------------------------------------------------------------------------------------------------------------------------------------------------------------------------------------------------------------------------------------------------------------------------------------------------------------------------------------------------------------------------------------------------------------------------------------------------------------------------------------------------------------------------------------------------------------------------------------------|
| Journal:                      | <i>BMJ Open</i>                                                                                                                                                                                                                                                                                                                                                                                                                                                                                                                                                                                                                                                                                                                                                                                                                                                                                                                                                                                                                                                                                                                                                                                                                                                                                                                                                                                                                                                                                                                                                                                                                                                                                                                                           |
| Manuscript ID                 | bmjopen-2022-069455                                                                                                                                                                                                                                                                                                                                                                                                                                                                                                                                                                                                                                                                                                                                                                                                                                                                                                                                                                                                                                                                                                                                                                                                                                                                                                                                                                                                                                                                                                                                                                                                                                                                                                                                       |
| Article Type:                 | Protocol                                                                                                                                                                                                                                                                                                                                                                                                                                                                                                                                                                                                                                                                                                                                                                                                                                                                                                                                                                                                                                                                                                                                                                                                                                                                                                                                                                                                                                                                                                                                                                                                                                                                                                                                                  |
| Date Submitted by the Author: | 21-Oct-2022                                                                                                                                                                                                                                                                                                                                                                                                                                                                                                                                                                                                                                                                                                                                                                                                                                                                                                                                                                                                                                                                                                                                                                                                                                                                                                                                                                                                                                                                                                                                                                                                                                                                                                                                               |
| Complete List of Authors:     | <p>Schoenmakers, Tom; Zuyderland Medical Centre Sittard-Geleen, Department of Clinical Chemistry &amp; Hematology; Maastricht University Faculty of Health Medicine and Life Sciences, Nutrition and Translational Research In Metabolism (NUTRIM)</p> <p>van Bussel, Bas; Maastricht University Medical Centre+, Department of Intensive Care; Maastricht University Care and Public Health Research Institute</p> <p>Gorissen, Stefan H.M.; Zuyderland Medical Centre Sittard-Geleen</p> <p>van Loo, Inge ; Maastricht University Medical Centre+, Department of microbiology, infectious diseases and infection prevention; Maastricht University Care and Public Health Research Institute</p> <p>van Rosmalen, Frank; Maastricht University Medical Centre+, Department of Intensive Care; Maastricht University Faculty of Health Medicine and Life Sciences, Cardiovascular Research Institute Maastricht (CARIM)</p> <p>Verboeket-van de Venne, Wilhelmine P.H.G.; Zuyderland Medical Centre Sittard-Geleen, Department of Clinical Chemistry &amp; Hematology</p> <p>Wolffs, Petra F.G.; Maastricht UMC+, Department of medical microbiology, infectious diseases and infection prevention; Maastricht University Care and Public Health Research Institute</p> <p>Van Mook, WN; Maastricht UMC+, Department of intensive care; Maastricht University Faculty of Health Medicine and Life Sciences, School of Health Professions Education (SHE)</p> <p>Consortium, CoLaIC ; Zuyderland Medical Centre Heerlen</p> <p>Leers, Mathie; Zuyderland Medical Centre Heerlen, Clinical Chemistry &amp; Hematology; Maastricht University Faculty of Health Medicine and Life Sciences, Nutrition and Translational Research in Metabolism (NUTRIM)</p> |
| Keywords:                     | COVID-19, INTENSIVE & CRITICAL CARE, Diagnostic microbiology < INFECTIOUS DISEASES, Clinical chemistry < PATHOLOGY, HAEMATOLOGY, Epidemiology < INFECTIOUS DISEASES                                                                                                                                                                                                                                                                                                                                                                                                                                                                                                                                                                                                                                                                                                                                                                                                                                                                                                                                                                                                                                                                                                                                                                                                                                                                                                                                                                                                                                                                                                                                                                                       |
|                               |                                                                                                                                                                                                                                                                                                                                                                                                                                                                                                                                                                                                                                                                                                                                                                                                                                                                                                                                                                                                                                                                                                                                                                                                                                                                                                                                                                                                                                                                                                                                                                                                                                                                                                                                                           |

SCHOLARONE™  
Manuscripts

1  
2  
3  
4  
5  
6  
7  
8  
9  
10  
11  
12  
13  
14  
15  
16  
17  
18  
19  
20  
21  
22  
23  
24  
25  
26  
27  
28  
29  
30  
31  
32  
33  
34  
35  
36  
37  
38  
39  
40  
41  
42  
43  
44  
45  
46  
47  
48  
49  
50  
51  
52  
53  
54  
55  
56  
57  
58  
59  
60

# Validating a clinical laboratory parameters-based de-isolation algorithm for COVID-19 patients in the intensive care unit using viability-PCR: the CoLaIC study protocol

Tom Schoenmakers<sup>1,2</sup> Bas C.T. van Bussel<sup>3,4,5</sup>, Stefan H.M. Gorissen<sup>6</sup>, Inge H.M. van Loo<sup>4,7</sup>, Frank van Rosmalen<sup>3,5</sup>, Wilhelmine P.H.G. Verboeket-van de Venne<sup>1</sup>, Petra F.G. Wolffs<sup>4,7</sup>, Walther N.K. A. van Mook<sup>3,8</sup>, Mathie P.G. Leers<sup>1,2,3</sup>, on behalf of the CoLaIC-consortium

<sup>1</sup> Department of Clinical Chemistry & Hematology, Zuyderland Medical Centre, Sittard-Geleen/Heerlen, the Netherlands

<sup>2</sup> School of Nutrition and Translational Research in Metabolism (NUTRIM), Maastricht University, Maastricht, the Netherlands

<sup>3</sup> Department of Intensive Care, Maastricht University Medical Centre +, Maastricht, the Netherlands

<sup>4</sup> Care and Public Health Research Institute (CAPHRI), Maastricht University, Maastricht, the Netherlands

<sup>5</sup> Cardiovascular Research Institute Maastricht (CARIM), Maastricht University, Maastricht, the Netherlands

<sup>6</sup> Zuyderland Academy, Zuyderland Medical Centre, Sittard-Geleen/Heerlen, the Netherlands

<sup>7</sup> Department of Medical Microbiology, Infectious diseases and Infection prevention, Maastricht University Medical Centre +, Maastricht, the Netherlands

1  
2  
3 <sup>8</sup> School of Health Professions Education (SHE), Maastricht University, Maastricht, the Netherlands  
4  
5  
6  
7

8 Word count: 2963  
9  
10  
11  
12

13 Key words: viability-PCR, COVID-19, SARS-CoV-2, CoLab, CoLaIC, study protocol, viral culture,  
14 host response, intensive care  
15  
16  
17

18  
19 Address for correspondence  
20

21 Tom Schoenmakers  
22

23 Department of Clinical Chemistry and Hematology  
24

25 Zuyderland Medical Centre, Sittard-Geleen  
26

27 Dr. H. van der Hoffplein 1, 6162 BG Sittard-Geleen  
28

29 The Netherlands  
30  
31

32 [t.schoenmakers@zuyderland.nl](mailto:t.schoenmakers@zuyderland.nl)  
33  
34  
35  
36  
37  
38  
39  
40  
41  
42  
43  
44  
45  
46  
47  
48  
49  
50  
51  
52  
53  
54  
55  
56  
57  
58  
59  
60

## Abstract

### Introduction

To investigate if biochemical and hematological changes due to the patient's host response (CoLab algorithm) in combination with a *severe acute respiratory syndrome-Coronavirus-2* (SARS-CoV-2) viability-PCR (v-PCR) can be used to determine when a COVID-19 patients is no longer infectious.

The hypothesis is that the CoLab algorithm in combination with v-PCR can be used to determine whether or not a COVID-19 patient is infectious and facilitate safe release of COVID-19 patients from isolation.

### Methods and analysis

This study consists of three parts using three different cohorts of patients. All three cohorts contain clinical, vital and laboratory parameters, as well as logistic data related to isolated COVID-19 patients, with focus on ICU-stay. The first cohort will be used to develop an algorithm for the course of the biochemical and hematological changes of the COVID-19 patient host response. Simultaneously, a second prospective cohort will be used to investigate the algorithm derived in the first cohort with daily measured laboratory parameters next to conventional SARS-CoV-2 RT-PCRs as well as v-PCR, to confirm the presence of intact SARS-CoV-2 particles in the patient.

Finally, a third multi-centre cohort, consisting of retrospectively collected data of COVID-19 patients admitted to the ICU will be used to validate the algorithm.

### Ethics and dissemination

This study was approved by the Medical Ethics Committee from MUMC+ (cohort I: 2020-1565/3 00 523) and Zuyderland MC (cohort II and III: METCZ20200057). All patients will be required to provide informed consent. Results from this study will be disseminated via peer-reviewed journals, congress/consortium presentations.

1  
2  
3  
4  
5  
6  
7  
8  
9  
10  
11  
12  
13  
14  
15  
16  
17  
18  
19  
20  
21  
22  
23  
24  
25  
26  
27  
28  
29  
30  
31  
32  
33  
34  
35  
36  
37  
38  
39  
40  
41  
42  
43  
44  
45  
46  
47  
48  
49  
50  
51  
52  
53  
54  
55  
56  
57  
58  
59  
60

For peer review only

## Article summary

### Strengths and limitations of this study

#### Strengths:

- Application of viability-PCR to determine intact viral particles
- The algorithm/model is based on routinely tested blood parameters and standardized laboratory tests
- The algorithm is previously successfully validated and implemented at the emergency department of two large teaching hospitals in the Netherlands
- Multi-centre approach with good distribution of hospitals covering various regions of the Netherlands
- Validation of the algorithm on a large data-set with COVID-19 patient data caused by different SARS-CoV-2 virus variants of concern (VOC)

#### Limitations:

- Viability-PCR is not determined in cohorts I and III
- Focus is limited to hospitals in the Netherlands
- Focus is limited to (de-)isolation in the ICU



## Introduction

The COVID-19 pandemic is globally disruptive regarding the continuation of regular health care. Hospitalized COVID-19 patients need to be isolated and separated from the non-COVID-19 patient population. This aspect paired with the large influx of COVID-19 patients and a limited availability of hospital and isolation beds, exerts enormous pressure on the regular non-COVID-19 healthcare, but also on healthcare professionals. In addition, the need for treatment and support in an intensive care unit (ICU) for a substantial subset of COVID-19 patients and the limited availability in number of ICU beds contributes to these effects. De-isolation as early as possible could improve quality of life for the affected patients, as well as decrease the pressure on the healthcare system and its professionals.

Reverse transcriptase-polymerase chain reaction (RT-PCR) testing is currently the gold standard to determine whether a patient is SARS-CoV-2 positive<sup>1</sup>. To de-isolate a COVID-19 ICU patient in the Netherlands two consecutive negative PCR tests are currently required. However, it can be hypothesized that SARS-CoV-2 RT-PCR positivity does not correlate per se with the actual presence of intact, infectious viruses<sup>2 3</sup>. Because RT-PCR detects nucleic acids, and does not make a distinction between intact infectious virus and non-intact non-infectious viral constituents, this may result in persistently positive RT-PCR test results, which hampers timely de-isolation<sup>1</sup>.

An alternative RT-PCR-based method to detect intact viral particles is to eliminate incomplete viral particles and RNA remnants before the actual RT-PCR is performed. Propidium monoazide (PMA) is a dye that binds irreversible to (deoxy)ribonucleic acid (DNA/RNA) and cannot penetrate cell membranes<sup>4</sup>. Pretreatment of a sample with PMA results in amplification of only intact particles. This so-called viability-PCR (v-PCR) has been shown to successfully measure the amount of viable micro-organisms, such as *Chlamydia trachomatis*, in a sample<sup>5</sup>. In the present study we want to adapt and validate this concept for the detection of intact viable RNA-containing SARS-CoV-2 virus.

1  
2  
3 Preliminary data have confirmed its applicability for SARS-CoV-2 diagnostics<sup>6</sup>. The adapted v-PCR  
4  
5 will be used in study herein presented to confirm the state of viability and thus potential infectivity of  
6  
7 SARS-CoV-2 in patients.  
8  
9

10 An alternative approach is to assess the host response of the suspected patient to the virus. One of  
11  
12 the methods to assess the host response to SARS-CoV-2 is the CoLab score. This score is  
13  
14 developed using an adaptive LASSO-regression technique and requires the input of the numerical  
15  
16 results of ten blood parameters and the age of the patient<sup>7</sup>. The required parameters are blood tests  
17  
18 that are requested frequently and routinely for emergency room (ER) as well as ICU patients. This  
19  
20 score has previously been developed and validated, and is already clinically implemented in the ER  
21  
22 departments of two large Dutch teachings hospitals, with very high negative predictive value (99.5%)  
23  
24 and sensitivity (96.9%)<sup>7</sup>. It is also utilized to exclude COVID-19 in a screening setting for health care  
25  
26 workers with COVID-19 suspected complaints<sup>8</sup>.  
27  
28  
29  
30  
31

32 Preliminary analysis of serially collected data in a pilot set of ICU patients showed a decrease in the  
33  
34 CoLab score resulting in normalization before a patient is discharged (unpublished data). For that  
35  
36 reason, we hypothesize that the biochemical and hematological changes in blood parameters  
37  
38 necessary to calculate the CoLab score rapidly return to normal values after the host clears the  
39  
40 SARS-CoV-2 infection.  
41  
42  
43  
44  
45

46 The aim of this study is to investigate whether biochemical and hematological changes due to the  
47  
48 patient's host response (CoLab algorithm) and/or the v-PCR can be reliably and validly used to  
49  
50 determine, at an earlier stage in comparison with a conventional SARS-CoV-2 RT-PCR, when a  
51  
52 COVID-19 patient is no longer infectious.  
53  
54  
55  
56  
57  
58

## 59 Methods and analysis 60

## Cohorts

This study is composed of three cohorts, two prospective cohorts (local and regional) and one retrospective cohort (national), which all consist of serially (i.e. daily) collected clinical and laboratory variables of COVID-19 patients in isolation at an ICU. We intend to include all patients admitted to one of our COVID-19 ICU isolation rooms.

More specifically, the three different cohorts will be used to study the CoLab score over time (local cohort I), to determine a cut-off point related to the intact infectious viral load (regional cohort II), and to validate the CoLab algorithm (national cohort III) on a national level with an external dataset (Figure 1). While not developed specifically for models using machine learning<sup>9</sup>, the study will follow the guidelines of the Transparent reporting of a multivariable prediction model for individual prognosis or diagnosis (TRIPOD).<sup>10</sup>

### Local single-centre prospective cohort (I)

The first, single centre, local cohort is the prospective Maastricht Intensive Care COVID (MaastrICht) cohort, previously described by Tas et al<sup>11</sup>. The CoLab score is calculated for each timepoint using this comprehensively characterized cohort<sup>11-17</sup>. In addition, the daily Sequential Organ Failure Assessment (SOFA)<sup>12 16</sup> scores are available as well as all conventional SARS-CoV-2 RT-PCRs that are measured within this cohort. The aim of study part I is to investigate the development of the CoLab score over time. To possibly de-isolate patients, the CoLab score should at least decrease over time in a way that is independent of disease severity and similar for survivors and non-survivors. We therefore hypothesize that the CoLab score decreases over time in both survivors and non-survivors, in a way that is independent of disease severity over time measured by serial SOFA scores. To have additional value above conventional RT-PCR-based de-isolation, the decrease in CoLab score should occur before de-isolation by RT-PCR is done. Our hypothesis is

1  
2  
3 that the CoLab score decrease is present before de-isolation can be performed based on RT-PCR.  
4  
5 We will explore the association between CoLab score over time and the moment of RT-PCR driven  
6  
7 de-isolation. If the CoLab score behaves over time in the ICU as hypothesized above, the next step  
8  
9 is to quantify what decrease in CoLab score over time (or what cut-of CoLab score per day) precedes  
10  
11 the transition from RT-PCR positive to negative. This decrease in CoLab score over time can be  
12  
13 used to develop a diagnostic prediction model for de-isolation. Whether this prediction model can be  
14  
15 used as gold standard for de-isolation (CoLab prediction model alone, or in combination with  
16  
17 conventional SARS-CoV-2 RT-PCR and/or v-PCR) is part of this study protocol.  
18  
19  
20  
21  
22

### 23 Regional dual-centre prospective cohort (II)

24  
25 In the second part, we hypothesize that excluding infectiousness, contributing to de-isolation, can  
26  
27 be done more accurately by using v-PCR instead of RT-PCR. A second prospectively collected dual  
28  
29 centre, regional cohort of COVID-19 patients from the ICU department of both Zuyderland Medical  
30  
31 Centre and Maastricht University Medical Centre + (MUMC+) will be used to evaluate the usability  
32  
33 of the v-PCR for the above-mentioned hypothesis. Inclusion of all consecutive COVID-19 ICU  
34  
35 patients will be pragmatic based on the development of the pandemic and related incidence of ICU  
36  
37 admission, starting from 1<sup>st</sup> November 2021. We aim to include a minimum of 90 patients. In this  
38  
39 cohort, serial data related to the CoLab algorithm will be collected daily. In addition, both  
40  
41 conventional (RT-PCR) and v-PCR testing for the detection of SARS-CoV-2 will be performed three  
42  
43 times a week. The aim of this regional cohort (II) is to determine a cut-off point or a certain decrease  
44  
45 in CoLab score over time that precedes the transition from positive to negative RT-PCR and v-PCR  
46  
47 results.  
48  
49  
50  
51  
52  
53  
54  
55  
56  
57  
58  
59  
60

### National multi-centre retrospective cohort (III)

For the third part of the study, a retrospectively collected multi-centre, national cohort will be used. This retrospective cohort will consist of ICU data derived from four other hospitals located in the Netherlands. This dataset will contain serially collected data necessary for determining the CoLab score (ten blood parameters and age, see below) next to conventional SARS-CoV-2 RT-PCR results. This cohort will be used to determine whether the CoLab algorithm developed and validated in the cohorts I and II in specific contexts are generalizable to, and valid in other contexts (cohort III). An additional aim is to test the CoLab algorithm for different variants of concern (VOC) of SARS-CoV-2 (see also below). For this purpose, we will use data from all COVID-19 positive ICU patients between March 2020 and September 2022 (estimated at least 250 patients per participating centre).

### Context and setting

Data from six hospitals will be used to create the different cohorts of this study. An overview of the number of hospital and ICU beds per participating hospital and per cohort is shown in Supplemental Table 1.

Local single-centre cohort I aims to use data obtained at MUMC+ (27 ICU and 6 high/medium care beds in the pre-pandemic era), a university medical Centre located in the southern part of the Netherlands. During the COVID-19 pandemic a maximum of 52 ICU beds were available for COVID-19 patients, and 12 for non-COVID-19 patients. Using this local cohort, the CoLab score will be observed over time.

Regional dual-centre cohort II consists of data from ICU patients from both Zuyderland MC (36 ICU beds) and MUMC+. These two hospitals are both located in Limburg in the Netherlands with an existing close cooperation for clinical purposes. Both hospitals are large teaching hospitals. This

1  
2  
3 regional cohort will be used to assess whether the CoLab score can be used to determine whether  
4 patients are SARS-CoV-2 free according to the results of the v-PCR.  
5  
6  
7

8  
9 National, multi-centre cohort III consists of retrospectively collected data from four other hospitals:  
10  
11 Leiden UMC, Radboud UMC, Medical Centre Leeuwarden and Catharina Hospital. The hospitals in  
12  
13 this cohort are located in separate provinces leading to a good geographical representation of the  
14  
15 national spread of the Dutch COVID-19 patient population. Since Leiden UMC and Radboud UMC  
16  
17 are university medical centres and Medical Centre Leeuwarden and Catharina Hospital are large  
18  
19 teaching hospitals, both hospital types are represented equally. This national cohort will serve to  
20  
21 further validate the model created using cohorts I and II in broader contexts (see Supplemental Table  
22  
23 1 for details of the different hospitals contributing to the consortium).  
24  
25  
26  
27

### 28 Patient and public involvement

29  
30  
31 The national patient organization for lung diseases (Longfonds) has a panel of patients that  
32  
33 experienced to be taken in isolation for COVID-19 on the ICU. This panel has read the study protocol  
34  
35 and gave advice which were implemented in this protocol. This group will also be involved during  
36  
37 the study to give asked and unsolicited remarks to this process.  
38  
39  
40

### 41 Inclusion and exclusion criteria

42  
43  
44 For the three cohorts, the same inclusion and exclusion criteria are applicable. All patients with a  
45  
46 proven primary and/or secondary SARS-CoV-2 infection are eligible to participate in the study.  
47  
48 Exclusion criteria include only patients with extreme laboratory values (more than 10 times the  
49  
50 standard deviation).  
51  
52  
53  
54  
55  
56  
57  
58  
59  
60

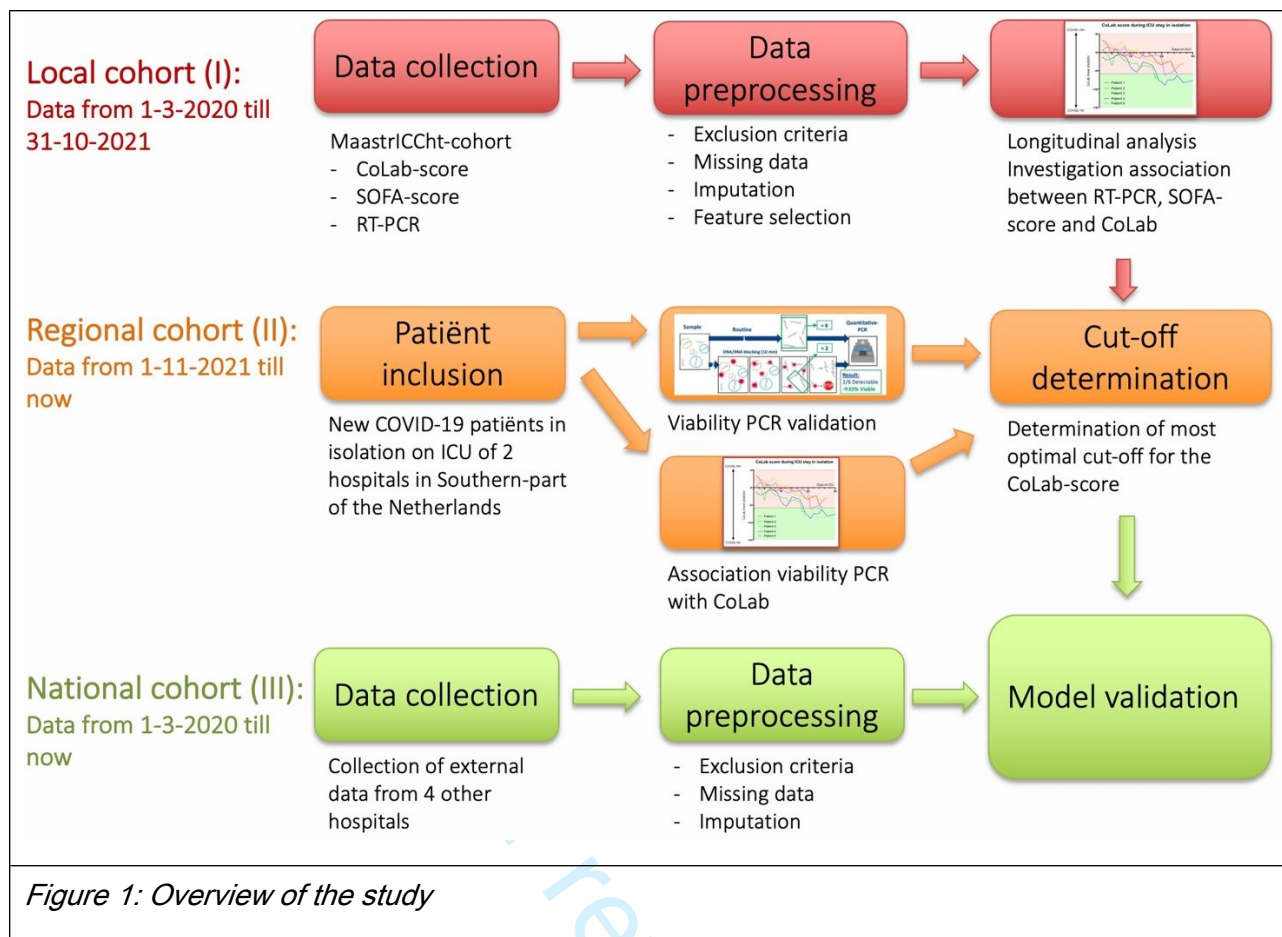

## Parameters

### Blood parameters

Blood samples are used to determine a variety of biochemical and hematological parameters in routine diagnostics and disease monitoring, from hospitalization till discharge of a COVID-19 patient. This has led to a large accumulation of blood-related biomarker data. Previous studies found biochemical and hematological changes measured in peripheral blood samples that characterized SARS-CoV-2 infection<sup>18-20</sup>. For instance, in the early stage of the COVID-19 disease, hematological changes in immunocompetent leukocytes correlate with a more severe disease progression<sup>20</sup>.

## CoLab score

The CoLab score<sup>7</sup> uses the erythrocytes [ $10^{12}/L$ ], leukocytes [ $10^9/L$ ], eosinophils [ $10^9/L$ ], basophils [ $10^9/L$ ],  $\log_{10}$  of bilirubin [ $\mu\text{mol}/L$ ],  $\log_{10}$  of lactate dehydrogenase (LD) [U/L],  $\log_{10}$  of alkaline phosphatase (ALP) [IU/L],  $\log_{10}$  of  $\gamma$ -glutamyltransferase ( $\gamma$ -GT) [U/L], albumin [g/L], C-reactive protein (CRP) [mg/L], and age [years accurate to two decimals]. These parameters are routinely determined in ICU patients and can be automatically extracted from the laboratory information system. The CoLab algorithm yields a score in the range of -20 to 5 (the so-called CoLab-linear predictor<sup>7</sup>), with a lower score correlating with the exclusion of a SARS-CoV-2 infection and a higher score reflecting an increased risk of SARS-CoV-2 infection.

In an emergency department study population, a cut-off of the CoLab linear predictor was determined to classify patients as being COVID-19 negative. This cut-off was originally set to -5.83 to minimize the amount of false negative results, with a score below -5.83 being negative for COVID-19<sup>7</sup>. How the CoLab-algorithm can be used to correspond with a negligible intact infectious viral load (see section below) is part of the present study: a cut-off or a certain decrease in CoLab-score over time. The CoLab score will be determined daily for all participating patients, either prospectively or retrospectively.

## Clinical parameters

In addition to the blood parameters, clinical variables of patients are collected in the different cohorts. These include co-morbidities and clinical scores as well as ventilation, biometric, and physical parameters<sup>12-17</sup>. One clinical score of interest is the Sequential Organ Failure Assessments (SOFA) score. This score has previously been associated with survival chance of mechanically ventilated COVID-19 patients<sup>12</sup>. A decrease in SOFA score is associated with survival. This sequentially determined SOFA score is measured over time and will be used to investigate whether the



association between the CoLab score over time and infectiousness is independent of the SOFA score. In fact, this will provide evidence whether the CoLab score operationalizes a different dimension of the host response, beyond multi-organ failure and in an independent way with regard to survival. This will generate evidence whether the CoLab score generates new information, beyond existing scores and has potential for diagnosis of de-isolation.

### Viability PCR (v-PCR)

A v-PCR<sup>6</sup> is performed to assess the presence of intact viruses and will be compared with the conventional SARS-CoV-2 RT-PCR test<sup>21</sup>. In short, nasopharyngeal samples are collected in viral transport medium (VTM) and propidium monoazide (PMA) is added to the sample<sup>22</sup>. Next to the v-PCR, a routine diagnostic RT-PCR for SARS-CoV-2 will be performed on the same sample (see also Figure 2). The difference in cycle-time values (Ct) between these two PCR tests will be reported as  $\Delta Ct$ , which is a reliable indication of the amount of intact virus in the sample.

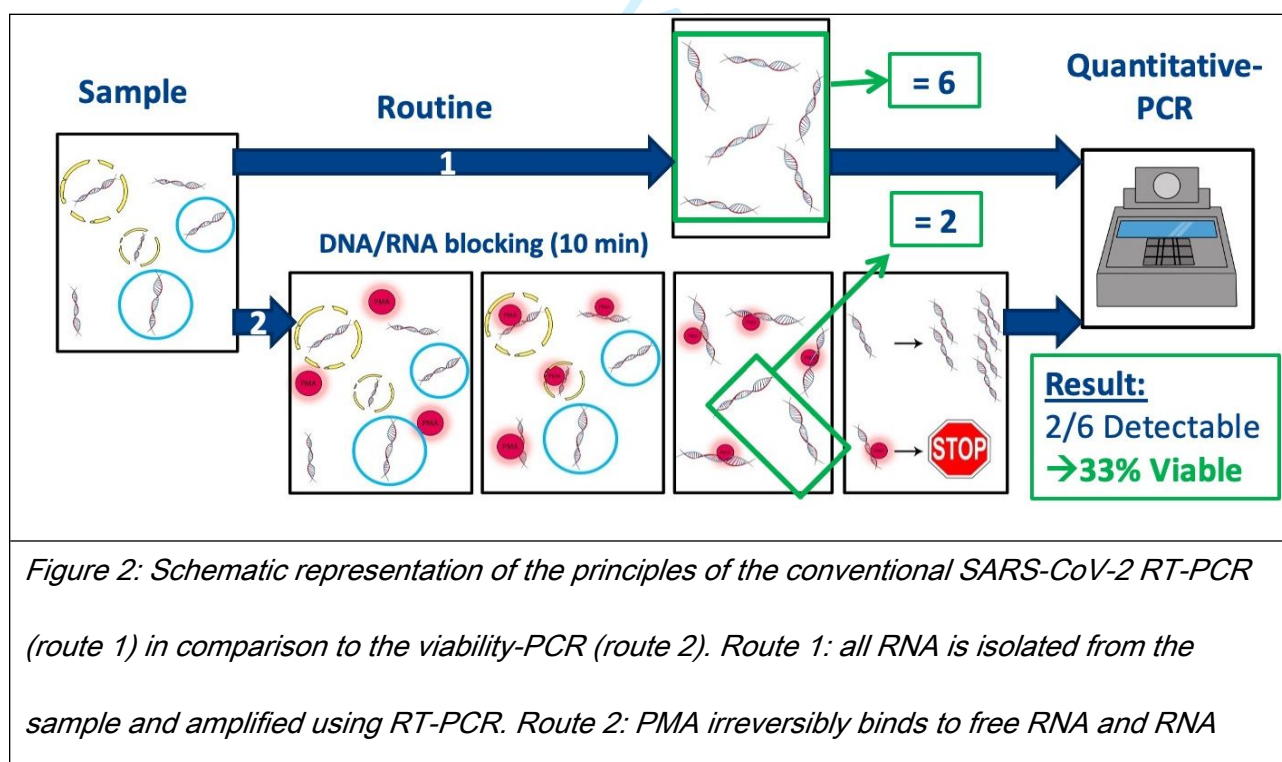

1  
2  
3  
4  
5  
6  
7  
8  
9  
10  
11  
12  
13  
14  
15  
16  
17  
18  
19  
20  
21  
22  
23  
24  
25  
26  
27  
28  
29  
30  
31  
32  
33  
34  
35  
36  
37  
38  
39  
40  
41  
42  
43  
44  
45  
46  
47  
48  
49  
50  
51  
52  
53  
54  
55  
56  
57  
58  
59  
60

*from non-intact virus particles. Only RNA from intact virus particles is isolated and amplified by RT-PCR.*

## Variants of Concern (VOC)

Due to the rapid mutation potential observed in viruses it is necessary to ensure the robustness of the CoLab algorithm to variants of concern of this SARS-CoV-2 virus (VOC's). This study will address VOC retrospectively as well as prospectively. Cohort III, spanning from March 2020 until present, contains data of the Wuhan original SARS-CoV-2 and data from at least three VOC. Demographic research has determined that during this period three VOC of the SARS-CoV-2 occurred next to the original SARS-CoV-2 virus (2020/03 to 2021/01): the B1.1.7 alpha-variant (2021/02 to 2021/06), the B1.617.2 delta-variant (2021/07 to 2021/12), and the B.1.1.529 omicron-variant (2022/01 to present)<sup>23</sup>. In this study, we use time periods to characterize VOC in cohort III. In contrast, in cohort II VOC's will be determined with variant-specific Next Generation Sequencing<sup>24</sup>.

## Statistical analysis

Analyses will be performed with R version 4.2.0 and with RStudio version 4.2.0<sup>25</sup>, combined with the packages Tidyverse<sup>26</sup>, lme4<sup>27</sup>, MICE<sup>28</sup>, MissForest<sup>29</sup> and Caret<sup>30</sup>. Missing values for numerical variables will be imputed using multiple imputation by chained equations (MICE).<sup>28</sup> Mixed-effects regression model analysis will be used to observe the CoLab score over time (cohort I), to determine whether the CoLab score is independent from survival and SOFA score (cohort I), and to determine the association between the CoLab score and the v-PCR (potentially cohort I and particularly cohort II). The reason for this is to determine the maximal cut-off value for the CoLab score to predict negligible viral load. If necessary, the CoLab model can be adjusted using LASSO regression to determine the optimal parameters used in this score. Lastly, the CoLab model will be validated using

1  
2  
3 Receiver Operator Curves (ROC), confusion matrices, and calibration curves in the analysis of  
4  
5 cohort III.  
6  
7

8  
9 For local cohort I, a prospective serially collected dataset of 324 COVID-19+ patients admitted to the  
10  
11 ICU of MUMC+ for mechanical ventilation is available. This also includes a subset of  
12  
13 immunocompromised patients (n=60). Adding interaction terms with immunocompromised groups to  
14  
15 the mixed models will test whether the development of the CoLab score over time differs for these  
16  
17 patients compared to non-immunocompromised patients.  
18  
19

20  
21 For regional cohort II, a negative v-PCR will be considered as the moment when a patient is not  
22  
23 infectious anymore. To assess whether a normalized CoLab-score can pinpoint this moment, we  
24  
25 expect that 95% of the patients will have a normalized CoLab-score within a time frame of two days  
26  
27 before and after the negative v-PCR. Using this proportion of 95% with a total width of the confidence  
28  
29 interval of 10%, and an alpha of 5%, we need to include at least 88 new COVID-19 patients admitted  
30  
31 to the ICU for mechanical ventilation.  
32  
33  
34

35  
36 For national cohort III we aim to include serially collected data from all COVID-19-positive patients  
37  
38 admitted to the ICU of the other participating hospitals for the purpose of validation.  
39  
40

## 41 42 Ethics and dissemination 43

44  
45 Ethical approval for study part I (METC nr: 2020-1565/3 00 523) was granted by the Medical Ethical  
46  
47 Committee from MUMC+ (Maastricht, the Netherlands). During the pandemic, the board of directors  
48  
49 of MUMC+ adopted a policy to inform patients and ask their consent to use the collected data and  
50  
51 to store blood samples for COVID-19 research purposes. The Medical Ethical Committee from  
52  
53 Zuyderland Medical Centre (Heerlen/Sittard-Geleen, the Netherlands) approved study parts II  
54  
55 (METCZ20210091-CoLaIC study) and III (METCZ20200057). The study is conducted in  
56  
57 concordance with the Declaration of Helsinki. Patients will be informed about the purpose and  
58  
59  
60

1  
2  
3 procedures of the study via verbal and written information and informed consent will be obtained. If  
4  
5 the patient is not able to communicate, e.g., due to ICU treatment, the next of kin will be approached.  
6  
7  
8 Results from this study will be disseminated via peer-reviewed journals, congress presentations, and  
9  
10 consortium presentations. The data generated will also be available upon request in a public, open  
11  
12 access repository.  
13  
14  
15  
16  
17  
18  
19  
20  
21  
22  
23  
24  
25  
26  
27  
28  
29  
30  
31  
32  
33  
34  
35  
36  
37  
38  
39  
40  
41  
42  
43  
44  
45  
46  
47  
48  
49  
50  
51  
52  
53  
54  
55  
56  
57  
58  
59  
60

For peer review only

## Collaborators

The members of the Dutch CoLaIC consortium are:

Stephanie M.C. Ament (MUMC+, Maastricht); M. Sesmu Arbous (LUMC, Leiden); Otto Bekers (MUMC+, Maastricht); Miranda van Berkel (Radboud UMC, Nijmegen); Arjen-Kars Boer (Catharina Hospital, Eindhoven); Dirck W. van Dam (Zuyderland MC, Sittard-Geleen/Heerlen); Ruben Deneer (Catharina Hospital, Eindhoven); William P.T.M. van Doorn (MUMC+, Maastricht); Tom P. Dormans (Zuyderland MC, Sittard-Geleen/Heerlen); Silvia M.A.A. Evers (Maastricht University, Maastricht); Tim Frenzel (Radboud UMC, Nijmegen); Judith Gillis (LUMC, Leiden); Iwan C.C. van der Horst (MUMC+, Maastricht); W. Nadia H. Koek (Medical Centre Leeuwarden, Leeuwarden); Kitty C.F.M. Linssen (Zuyderland MC, Sittard-Geleen); Steven J.R. Meex (MUMC+, Maastricht); Guy J.M. Mostard (Zuyderland MC, Sittard-Geleen); Remy L.M. Mostard (Zuyderland MC, Sittard-Geleen); Luuk C. Otterspoor (Catharina Hospital, Eindhoven); Natal A.W. van Riel (Technical University, Eindhoven); Frans Stals (Zuyderland MC, Sittard-Geleen); Albert Wolthuis (Medical Centre Leeuwarden, Leeuwarden).

## Author contributions

Study design: BvB, IvL, PW, WvM and MPGL; Development of the study protocol: BvB, IvL, PW, WvM, SG and MPGL; Patient recruitment: BvB and WvM; Data collection: TS and FvR; Manuscript preparation: TS, BvB, PW, IvL, WvM and MPGL. The members of the CoLaIC-consortium co-designed the study protocol, selected potential participants, assisted in their recruitment, collected data, and set up, prepared and hosted COVID-19 databases. All authors read and approved the final manuscript.

## Funding

This publication is part of the CoLaIC project with project number 10430102110002 of the COVID-19 research program which is (partly) financed by the Netherlands Organisation for Health Research and Development (ZonMw).

## Competing interests

None declared

## Patients and public involvement

Patients (e.g., Longfonds) were and will be involved in the design and dissemination plans of this research.

## Patient consent for publication

Not applicable

## Orcid iD

|                         |                     |
|-------------------------|---------------------|
| Bas C.T. van Bussel     | 0000-0003-1621-7848 |
| Stefan H.M. Gorissen    | 0000-0003-3737-9053 |
| Math P.G. Leers         | 0000-0001-5186-5600 |
| Inge H.M. van Loo       | 0000-0002-5960-4357 |
| Walther N.K.A. van Mook | 0000-0003-2398-8878 |

|    |                                          |                     |
|----|------------------------------------------|---------------------|
| 1  |                                          |                     |
| 2  |                                          |                     |
| 3  | Frank van Rosmalen                       | 0000-0002-9522-3711 |
| 4  |                                          |                     |
| 5  |                                          |                     |
| 6  | Tom Schoenmakers                         | 0000-0002-1576-7832 |
| 7  |                                          |                     |
| 8  |                                          |                     |
| 9  | Wilhelmine P.H.G. Verboeket-van de Venne | 0000-0003-4980-0116 |
| 10 |                                          |                     |
| 11 |                                          |                     |
| 12 | Petra Wolffs                             | 0000-0002-5326-3985 |
| 13 |                                          |                     |
| 14 |                                          |                     |
| 15 |                                          |                     |
| 16 |                                          |                     |
| 17 |                                          |                     |
| 18 |                                          |                     |
| 19 |                                          |                     |
| 20 |                                          |                     |
| 21 |                                          |                     |
| 22 |                                          |                     |
| 23 |                                          |                     |
| 24 |                                          |                     |
| 25 |                                          |                     |
| 26 |                                          |                     |
| 27 |                                          |                     |
| 28 |                                          |                     |
| 29 |                                          |                     |
| 30 |                                          |                     |
| 31 |                                          |                     |
| 32 |                                          |                     |
| 33 |                                          |                     |
| 34 |                                          |                     |
| 35 |                                          |                     |
| 36 |                                          |                     |
| 37 |                                          |                     |
| 38 |                                          |                     |
| 39 |                                          |                     |
| 40 |                                          |                     |
| 41 |                                          |                     |
| 42 |                                          |                     |
| 43 |                                          |                     |
| 44 |                                          |                     |
| 45 |                                          |                     |
| 46 |                                          |                     |
| 47 |                                          |                     |
| 48 |                                          |                     |
| 49 |                                          |                     |
| 50 |                                          |                     |
| 51 |                                          |                     |
| 52 |                                          |                     |
| 53 |                                          |                     |
| 54 |                                          |                     |
| 55 |                                          |                     |
| 56 |                                          |                     |
| 57 |                                          |                     |
| 58 |                                          |                     |
| 59 |                                          |                     |
| 60 |                                          |                     |

For peer review only

## References

1. Moghadas SM, Fitzpatrick MC, Sah P, et al. The implications of silent transmission for the control of COVID-19 outbreaks. *Proc Natl Acad Sci U S A* 2020;117(30):17513-15. doi: 10.1073/pnas.2008373117 [published Online First: 20200706]
2. Marik PE, Iglesias J, Varon J, et al. A scoping review of the pathophysiology of COVID-19. *Int J Immunopathol Pharmacol* 2021;35:20587384211048026. doi: 10.1177/20587384211048026
3. van Kampen JJA, van de Vijver D, Fraaij PLA, et al. Duration and key determinants of infectious virus shedding in hospitalized patients with coronavirus disease-2019 (COVID-19). *Nat Commun* 2021;12(1):267. doi: 10.1038/s41467-020-20568-4 [published Online First: 2021/01/13]
4. Nocker A, Cheung CY, Camper AK. Comparison of propidium monoazide with ethidium monoazide for differentiation of live vs. dead bacteria by selective removal of DNA from dead cells. *J Microbiol Methods* 2006;67(2):310-20. doi: 10.1016/j.mimet.2006.04.015 [published Online First: 20060605]
5. Janssen KJ, Hoebe CJ, Dukers-Muijrers NH, et al. Viability-PCR Shows That NAAT Detects a High Proportion of DNA from Non-Viable Chlamydia trachomatis. *PLoS One* 2016;11(11):e0165920. doi: 10.1371/journal.pone.0165920 [published Online First: 20161103]
6. Hong W, Xiong J, Nyaruaba R, et al. Rapid determination of infectious SARS-CoV-2 in PCR-positive samples by SDS-PMA assisted RT-qPCR. *Sci Total Environ* 2021;797:149085. doi: 10.1016/j.scitotenv.2021.149085 [published Online First: 20210717]
7. Boer AK, Deneer R, Maas M, et al. Development and validation of an early warning score to identify COVID-19 in the emergency department based on routine laboratory tests: a multicentre case-control study. *BMJ Open* 2022;12(8):e059111. doi: 10.1136/bmjopen-2021-059111 [published Online First: 20220803]
8. Leers MPG, Deneer R, Mostard GJM, et al. Use of an algorithm based on routine blood laboratory tests to exclude COVID-19 in a screening-setting of healthcare workers. *PLoS One* 2022;17(6):e0270548. doi: 10.1371/journal.pone.0270548 [published Online First: 20220628]
9. Collins GS, Moons KGM. Reporting of artificial intelligence prediction models. *Lancet* 2019;393(10181):1577-79. doi: 10.1016/S0140-6736(19)30037-6 [published Online First: 2019/04/23]
10. Collins GS, Reitsma JB, Altman DG, et al. Transparent reporting of a multivariable prediction model for individual prognosis or diagnosis (TRIPOD): the TRIPOD statement. *BMJ* 2015;350:g7594. doi: 10.1136/bmj.g7594 [published Online First: 2015/01/09]
11. Tas J, van Gassel RJJ, Heines SJH, et al. Serial measurements in COVID-19-induced acute respiratory disease to unravel heterogeneity of the disease course: design of the Maastricht



- 1  
2  
3 Intensive Care COVID cohort (MaastrICht). *BMJ Open* 2020;10(9):e040175. doi:  
4 10.1136/bmjopen-2020-040175 [published Online First: 2020/10/01]  
5  
6  
7 12. Bels JLM, van Kuijk SMJ, Ghossein-Doha C, et al. Decreased serial scores of severe organ  
8 failure assessments are associated with survival in mechanically ventilated patients; the  
9 prospective Maastricht Intensive Care COVID cohort. *J Crit Care* 2021;62:38-45. doi:  
10 10.1016/j.jcrc.2020.11.006 [published Online First: 20201117]  
11  
12  
13 13. Ghossein MA, Driessen RGH, van Rosmalen F, et al. Serial Assessment of Myocardial Injury  
14 Markers in Mechanically Ventilated Patients With SARS-CoV-2 (from the Prospective  
15 MaastrICht Cohort). *Am J Cardiol* 2022;170:118-27. doi: 10.1016/j.amjcard.2022.01.030  
16 [published Online First: 20220224]  
17  
18  
19 14. Heines SJH, van Bussel BCT, Jong MJA, et al. Pulmonary pathophysiology development of  
20 COVID-19 assessed by serial Electrical Impedance Tomography in the MaastrICht cohort. *Sci*  
21 *Rep* 2022;12(1):14517. doi: 10.1038/s41598-022-18843-z [published Online First: 20220825]  
22  
23  
24 15. Hulshof AM, Bruggemann RAG, Mulder MMG, et al. Serial EXTEM, FIBTEM, and tPA Rotational  
25 Thromboelastometry Observations in the Maastricht Intensive Care COVID Cohort-Persistence  
26 of Hypercoagulability and Hypofibrinolysis Despite Anticoagulation. *Front Cardiovasc Med*  
27 2021;8:654174. doi: 10.3389/fcvm.2021.654174 [published Online First: 20210426]  
28  
29  
30 16. Martens B, Driessen RGH, Brandts L, et al. Coronary Artery Calcifications Are Associated With  
31 More Severe Multiorgan Failure in Patients With Severe Coronavirus Disease 2019 Infection:  
32 Longitudinal Results of the Maastricht Intensive Care COVID Cohort. *J Thorac Imaging*  
33 2022;37(4):217-24. doi: 10.1097/RTI.0000000000000648 [published Online First: 20220413]  
34  
35  
36 17. Mulder MMG, Brandts L, Bruggemann RAG, et al. Serial markers of coagulation and  
37 inflammation and the occurrence of clinical pulmonary thromboembolism in mechanically  
38 ventilated patients with SARS-CoV-2 infection; the prospective Maastricht intensive care COVID  
39 cohort. *Thromb J* 2021;19(1):35. doi: 10.1186/s12959-021-00286-7 [published Online First:  
40 20210531]  
41  
42  
43 18. Linssen J, Ermens A, Berrevoets M, et al. A novel haemocytometric COVID-19 prognostic score  
44 developed and validated in an observational multicentre European hospital-based study. *Elife*  
45 2020;9 doi: 10.7554/eLife.63195 [published Online First: 20201126]  
46  
47  
48 19. Lippi G, Plebani M. The critical role of laboratory medicine during coronavirus disease 2019  
49 (COVID-19) and other viral outbreaks. *Clin Chem Lab Med* 2020;58(7):1063-69. doi:  
50 10.1515/cclm-2020-0240 [published Online First: 2020/03/20]  
51  
52  
53 20. Martens RJH, van Adrichem AJ, Mattheij NJA, et al. Hemocytometric characteristics of COVID-  
54 19 patients with and without cytokine storm syndrome on the sysmex XN-10 hematology  
55 analyzer. *Clin Chem Lab Med* 2021;59(4):783-93. doi: 10.1515/cclm-2020-1529 [published  
56 Online First: 20201209]  
57  
58  
59  
60

- 1
- 2
- 3
- 4 21. Corman VM, Landt O, Kaiser M, et al. Detection of 2019 novel coronavirus (2019-nCoV) by real-
- 5 time RT-PCR. *Euro Surveill* 2020;25(3) doi: 10.2807/1560-7917.ES.2020.25.3.2000045
- 6
- 7 22. Nkuipou-Kenfack E, Engel H, Fakih S, et al. Improving efficiency of viability-PCR for selective
- 8 detection of live cells. *J Microbiol Methods* 2013;93(1):20-4. doi: 10.1016/j.mimet.2013.01.018
- 9 [published Online First: 20130204]
- 10
- 11 23. RIVM tN. Variants of the coronavirus SARS-CoV-2 (Dutch: varianten van het coronavirus SARS-
- 12 CoV-2), 2022.
- 13
- 14 24. Gorgels KMF, Dingemans J, van der Veer B, et al. Linked nosocomial COVID-19 outbreak in
- 15 three facilities for people with intellectual and developmental disabilities due to SARS-CoV-2
- 16 variant B.1.1.519 with spike mutation T478K in the Netherlands. *BMC Infect Dis* 2022;22(1):139.
- 17 doi: 10.1186/s12879-022-07121-y [published Online First: 20220210]
- 18
- 19 25. (2020) RCT. R: A language and environment for statistical computing. R Foundation for Statistical
- 20 Computing, 2022 [Available from: <http://www.r-project.org/index.html>].
- 21
- 22 26. Wickham H, Averick M, Bryan J, et al. Welcome to the {tidyverse}. *Journal of Open Source*
- 23 *Software* 2019;4:1686. doi: 10.21105/joss.01686
- 24
- 25 27. Bates D, Mächler M, Bolker B, et al. Fitting Linear Mixed-Effects Models Using lme4. *Journal of*
- 26 *Statistical Software* 2015;67(1):1-48. doi: 10.18637/jss.v067.i01
- 27
- 28 28. Buuren van S, Groothuis-Oudshoorn K. MICE: Multivariate Imputation by Chained Equations in
- 29 R. *J Stat Soft* 2011;45(3):1-67.
- 30
- 31 29. Stekhoven DJ, Bühlmann P. MissForest--non-parametric missing value imputation for mixed-
- 32 type data. *Bioinformatics* 2012;28(1):112-8. doi: 10.1093/bioinformatics/btr597 [published
- 33 Online First: 2011/11/01]
- 34
- 35 30. Kuhn M. Building predictive models in R using the caret Package. *J Stat Software* 2008;28(5):1-
- 36 26.
- 37
- 38
- 39
- 40
- 41
- 42
- 43
- 44
- 45
- 46
- 47
- 48
- 49
- 50
- 51
- 52
- 53
- 54
- 55
- 56
- 57
- 58
- 59
- 60

## Supplemental

Supplemental Table 1. Overview of the hospitals participating in the study

| Hospital                     | Location                                 | Type of hospital          | ICU beds* | Hospital beds | Cohort  |
|------------------------------|------------------------------------------|---------------------------|-----------|---------------|---------|
| Maastricht UMC+              | Maastricht, the Netherlands              | University medical centre | 33        | 715           | I & III |
| Zuyderland MC                | Sittard-Geleen, Heerlen, the Netherlands | Large teaching hospital   | 36        | 980           | II      |
| Leiden UMC                   | Leiden, the Netherlands                  | University medical centre | 45        | 882           | III     |
| Radboud UMC                  | Nijmegen, the Netherlands                | University medical centre | 35        | 1.065         | III     |
| Medical Centre<br>Leeuwarden | Leeuwarden, the Netherlands              | Large teaching hospital   | 39        | 647           | III     |
| Catharina Hospital           | Eindhoven, the Netherlands               | Large teaching hospital   | 36        | 696           | III     |

\*non-pandemic situation; UMC= university medical centre

1  
2  
3  
4  
5  
6  
7  
8  
9  
10  
11  
12  
13  
14  
15  
16  
17  
18  
19  
20  
21  
22  
23  
24  
25  
26  
27  
28  
29  
30  
31  
32  
33  
34  
35  
36  
37  
38  
39  
40  
41  
42  
43  
44  
45  
46  
47  
48  
49  
50  
51  
52  
53  
54  
55  
56  
57  
58  
59  
60

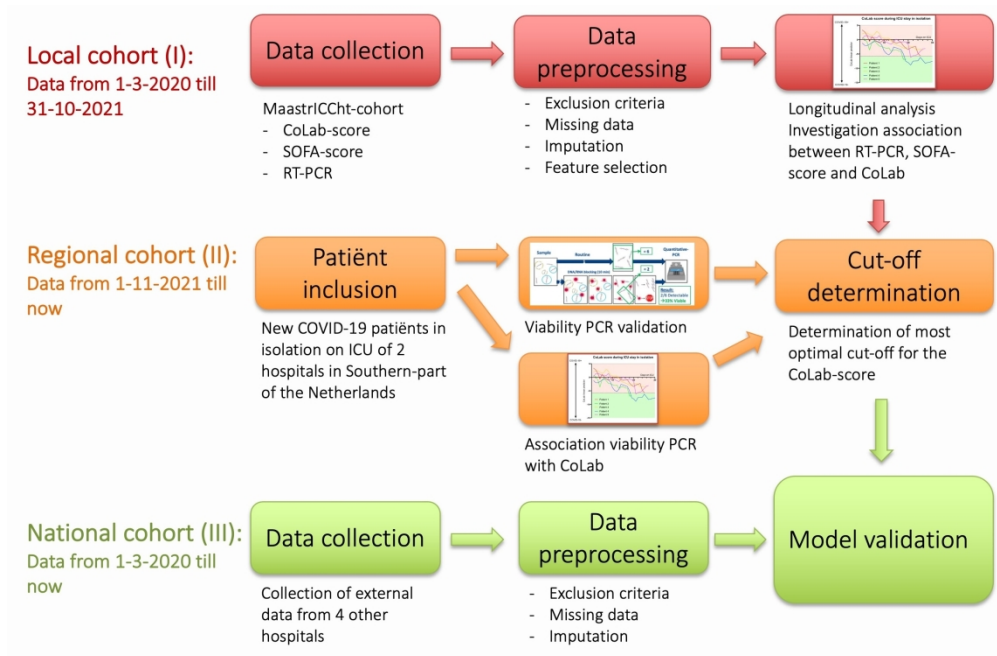

237x156mm (284 x 284 DPI)

1  
2  
3  
4  
5  
6  
7  
8  
9  
10  
11  
12  
13  
14  
15  
16  
17  
18  
19  
20  
21  
22  
23  
24  
25  
26  
27  
28  
29  
30  
31  
32  
33  
34  
35  
36  
37  
38  
39  
40  
41  
42  
43  
44  
45  
46  
47  
48  
49  
50  
51  
52  
53  
54  
55  
56  
57  
58  
59  
60

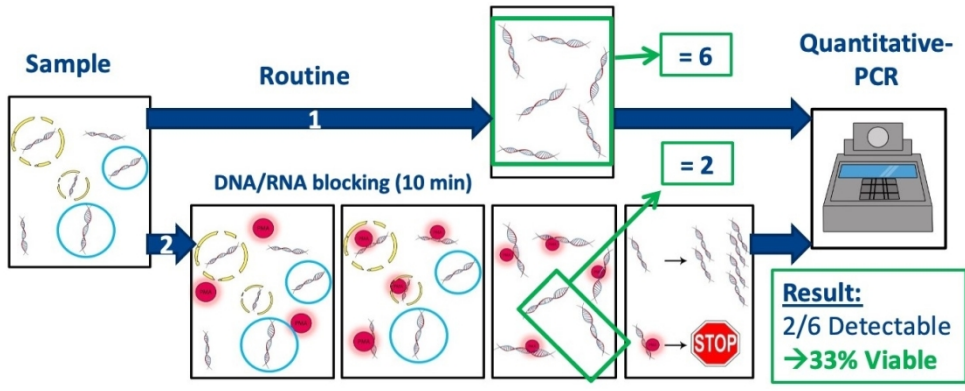

252x100mm (142 x 142 DPI)

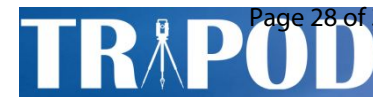

TRIPOD Checklist: Prediction Model Development and Validation

| Section/Topic                | Item | Checklist Item | Page                                                                                                                                                                                                  |        |
|------------------------------|------|----------------|-------------------------------------------------------------------------------------------------------------------------------------------------------------------------------------------------------|--------|
| <b>Title and abstract</b>    |      |                |                                                                                                                                                                                                       |        |
| Title                        | 1    | D;V            | Identify the study as developing and/or validating a multivariable prediction model, the target population, and the outcome to be predicted.                                                          | P1     |
| Abstract                     | 2    | D;V            | Provide a summary of objectives, study design, setting, participants, sample size, predictors, outcome, statistical analysis, results, and conclusions.                                               | P3     |
| <b>Introduction</b>          |      |                |                                                                                                                                                                                                       |        |
| Background and objectives    | 3a   | D;V            | Explain the medical context (including whether diagnostic or prognostic) and rationale for developing or validating the multivariable prediction model, including references to existing models.      | P5     |
|                              | 3b   | D;V            | Specify the objectives, including whether the study describes the development or validation of the model or both.                                                                                     | P5/6   |
| <b>Methods</b>               |      |                |                                                                                                                                                                                                       |        |
| Source of data               | 4a   | D;V            | Describe the study design or source of data (e.g., randomized trial, cohort, or registry data), separately for the development and validation data sets, if applicable.                               | P6/7   |
|                              | 4b   | D;V            | Specify the key study dates, including start of accrual; end of accrual; and, if applicable, end of follow-up.                                                                                        | P6/7   |
| Participants                 | 5a   | D;V            | Specify key elements of the study setting (e.g., primary care, secondary care, general population) including number and location of centres.                                                          | P6/7   |
|                              | 5b   | D;V            | Describe eligibility criteria for participants.                                                                                                                                                       | P8     |
|                              | 5c   | D;V            | Give details of treatments received, if relevant.                                                                                                                                                     | n/a    |
| Outcome                      | 6a   | D;V            | Clearly define the outcome that is predicted by the prediction model, including how and when assessed.                                                                                                | P10    |
|                              | 6b   | D;V            | Report any actions to blind assessment of the outcome to be predicted.                                                                                                                                | n/a    |
| Predictors                   | 7a   | D;V            | Clearly define all predictors used in developing or validating the multivariable prediction model, including how and when they were measured.                                                         | P10    |
|                              | 7b   | D;V            | Report any actions to blind assessment of predictors for the outcome and other predictors.                                                                                                            | n/a    |
| Sample size                  | 8    | D;V            | Explain how the study size was arrived at.                                                                                                                                                            | P12    |
| Missing data                 | 9    | D;V            | Describe how missing data were handled (e.g., complete-case analysis, single imputation, multiple imputation) with details of any imputation method.                                                  | P11/12 |
| Statistical analysis methods | 10a  | D              | Describe how predictors were handled in the analyses.                                                                                                                                                 | P11/12 |
|                              | 10b  | D              | Specify type of model, all model-building procedures (including any predictor selection), and method for internal validation.                                                                         | P11/12 |
|                              | 10c  | V              | For validation, describe how the predictions were calculated.                                                                                                                                         | P12    |
|                              | 10d  | D;V            | Specify all measures used to assess model performance and, if relevant, to compare multiple models.                                                                                                   | P12    |
|                              | 10e  | V              | Describe any model updating (e.g., recalibration) arising from the validation, if done.                                                                                                               | P12    |
| Risk groups                  | 11   | D;V            | Provide details on how risk groups were created, if done.                                                                                                                                             | P8     |
| Development vs. validation   | 12   | V              | For validation, identify any differences from the development data in setting, eligibility criteria, outcome, and predictors.                                                                         | P12    |
| <b>Results</b>               |      |                |                                                                                                                                                                                                       |        |
| Participants                 | 13a  | D;V            | Describe the flow of participants through the study, including the number of participants with and without the outcome and, if applicable, a summary of the follow-up time. A diagram may be helpful. | n/a    |
|                              | 13b  | D;V            | Describe the characteristics of the participants (basic demographics, clinical features, available predictors), including the number of participants with missing data for predictors and outcome.    | n/a    |
|                              | 13c  | V              | For validation, show a comparison with the development data of the distribution of important variables (demographics, predictors and outcome).                                                        | n/a    |
| Model development            | 14a  | D              | Specify the number of participants and outcome events in each analysis.                                                                                                                               | n/a    |
|                              | 14b  | D              | If done, report the unadjusted association between each candidate predictor and outcome.                                                                                                              | n/a    |
| Model specification          | 15a  | D              | Present the full prediction model to allow predictions for individuals (i.e., all regression coefficients, and model intercept or baseline survival at a given time point).                           | n/a    |
|                              | 15b  | D              | Explain how to use the prediction model.                                                                                                                                                              | n/a    |
| Model performance            | 16   | D;V            | Report performance measures (with CIs) for the prediction model.                                                                                                                                      | n/a    |
| Model-updating               | 17   | V              | If done, report the results from any model updating (i.e., model specification, model performance).                                                                                                   | n/a    |
| <b>Discussion</b>            |      |                |                                                                                                                                                                                                       |        |
| Limitations                  | 18   | D;V            | Discuss any limitations of the study (such as nonrepresentative sample, few events per predictor, missing data).                                                                                      | n/a    |
| Interpretation               | 19a  | V              | For validation, discuss the results with reference to performance in the development data, and any other validation data.                                                                             | n/a    |
|                              | 19b  | D;V            | Give an overall interpretation of the results, considering objectives, limitations, results from similar studies, and other relevant evidence.                                                        | n/a    |
| Implications                 | 20   | D;V            | Discuss the potential clinical use of the model and implications for future research.                                                                                                                 | n/a    |
| <b>Other information</b>     |      |                |                                                                                                                                                                                                       |        |
| Supplementary information    | 21   | D;V            | Provide information about the availability of supplementary resources, such as study protocol, Web calculator, and data sets.                                                                         | n/a    |
| Funding                      | 22   | D;V            | Give the source of funding and the role of the funders for the present study.                                                                                                                         | P13    |

\*Items relevant only to the development of a prediction model are denoted by D, items relating solely to a validation of a prediction model are denoted by V, and items relating to both are denoted D;V. We recommend using the TRIPOD Checklist in conjunction with the TRIPOD Explanation and Elaboration document.

STROBE Statement—Checklist of items that should be included in reports of *cohort studies*

|                              | Item No | Recommendation                                                                                                                                                                                                                                                                                                         | Page No                               |
|------------------------------|---------|------------------------------------------------------------------------------------------------------------------------------------------------------------------------------------------------------------------------------------------------------------------------------------------------------------------------|---------------------------------------|
| <b>Title and abstract</b>    | 1       | (a) Indicate the study's design with a commonly used term in the title or the abstract<br>(b) Provide in the abstract an informative and balanced summary of what was done and what was found                                                                                                                          | P1<br>P3                              |
| <b>Introduction</b>          |         |                                                                                                                                                                                                                                                                                                                        |                                       |
| Background/rationale         | 2       | Explain the scientific background and rationale for the investigation being reported                                                                                                                                                                                                                                   | P5                                    |
| Objectives                   | 3       | State specific objectives, including any prespecified hypotheses                                                                                                                                                                                                                                                       | P6                                    |
| <b>Methods</b>               |         |                                                                                                                                                                                                                                                                                                                        |                                       |
| Study design                 | 4       | Present key elements of study design early in the paper                                                                                                                                                                                                                                                                | P6                                    |
| Setting                      | 5       | Describe the setting, locations, and relevant dates, including periods of recruitment, exposure, follow-up, and data collection                                                                                                                                                                                        | P8                                    |
| Participants                 | 6       | (a) Give the eligibility criteria, and the sources and methods of selection of participants. Describe methods of follow-up<br>(b) For matched studies, give matching criteria and number of exposed and unexposed                                                                                                      | P8<br>n/a                             |
| Variables                    | 7       | Clearly define all outcomes, exposures, predictors, potential confounders, and effect modifiers. Give diagnostic criteria, if applicable                                                                                                                                                                               | P10                                   |
| Data sources/<br>measurement | 8*      | For each variable of interest, give sources of data and details of methods of assessment (measurement). Describe comparability of assessment methods if there is more than one group                                                                                                                                   | P9/11                                 |
| Bias                         | 9       | Describe any efforts to address potential sources of bias                                                                                                                                                                                                                                                              | t.b.d.                                |
| Study size                   | 10      | Explain how the study size was arrived at                                                                                                                                                                                                                                                                              | P12                                   |
| Quantitative variables       | 11      | Explain how quantitative variables were handled in the analyses. If applicable, describe which groupings were chosen and why                                                                                                                                                                                           | P11/12                                |
| Statistical methods          | 12      | (a) Describe all statistical methods, including those used to control for confounding<br>(b) Describe any methods used to examine subgroups and interactions<br>(c) Explain how missing data were addressed<br>(d) If applicable, explain how loss to follow-up was addressed<br>(e) Describe any sensitivity analyses | P11/12<br>P10/11<br>P12<br>n/a<br>P11 |
| <b>Results</b>               |         |                                                                                                                                                                                                                                                                                                                        |                                       |
| Participants                 | 13*     | (a) Report numbers of individuals at each stage of study—eg numbers potentially eligible, examined for eligibility, confirmed eligible, included in the study, completing follow-up, and analysed<br>(b) Give reasons for non-participation at each stage<br>(c) Consider use of a flow diagram                        | Not present in protocol paper         |
| Descriptive data             | 14*     | (a) Give characteristics of study participants (eg demographic, clinical, social) and information on exposures and potential confounders<br>(b) Indicate number of participants with missing data for each variable of interest                                                                                        | Not present in protocol paper         |

1  
2  
3  
4  
5  
6  
7  
8  
9  
10  
11  
12  
13  
14  
15  
16  
17  
18  
19  
20  
21  
22  
23  
24  
25  
26  
27  
28  
29  
30  
31  
32  
33  
34  
35  
36  
37  
38  
39  
40  
41  
42  
43  
44  
45  
46  
47  
48  
49  
50  
51  
52  
53  
54  
55  
56  
57  
58  
59  
60

(c) Summarise follow-up time (eg, average and total amount)

|              |     |                                                                |                               |
|--------------|-----|----------------------------------------------------------------|-------------------------------|
| Outcome data | 15* | Report numbers of outcome events or summary measures over time | Not present in protocol paper |
|--------------|-----|----------------------------------------------------------------|-------------------------------|

For peer review only



|                                           |                  |    |                                                                                                                                                                                                                                                                                                                                                                                                                   |                               |
|-------------------------------------------|------------------|----|-------------------------------------------------------------------------------------------------------------------------------------------------------------------------------------------------------------------------------------------------------------------------------------------------------------------------------------------------------------------------------------------------------------------|-------------------------------|
| 1<br>2<br>3<br>4<br>5<br>6<br>7<br>8<br>9 | Main results     | 16 | (a) Give unadjusted estimates and, if applicable, confounder-adjusted estimates and their precision (eg, 95% confidence interval). Make clear which confounders were adjusted for and why they were included<br><br>(b) Report category boundaries when continuous variables were categorized<br>(c) If relevant, consider translating estimates of relative risk into absolute risk for a meaningful time period | Not present in protocol paper |
| 10<br>11<br>12<br>13<br>14                | Other analyses   | 17 | Report other analyses done—eg analyses of subgroups and interactions, and sensitivity analyses                                                                                                                                                                                                                                                                                                                    | Not present in protocol paper |
| <b>Discussion</b>                         |                  |    |                                                                                                                                                                                                                                                                                                                                                                                                                   |                               |
| 15<br>16<br>17<br>18<br>19<br>20          | Key results      | 18 | Summarise key results with reference to study objectives                                                                                                                                                                                                                                                                                                                                                          | Not present in protocol paper |
| 21<br>22<br>23                            | Limitations      | 19 | Discuss limitations of the study, taking into account sources of potential bias or imprecision. Discuss both direction and magnitude of any potential bias                                                                                                                                                                                                                                                        | P2                            |
| 24<br>25<br>26<br>27                      | Interpretation   | 20 | Give a cautious overall interpretation of results considering objectives, limitations, multiplicity of analyses, results from similar studies, and other relevant evidence                                                                                                                                                                                                                                        | Not present in protocol paper |
| 28<br>29<br>30<br>31<br>32                | Generalisability | 21 | Discuss the generalisability (external validity) of the study results                                                                                                                                                                                                                                                                                                                                             | Not present in protocol paper |
| <b>Other information</b>                  |                  |    |                                                                                                                                                                                                                                                                                                                                                                                                                   |                               |
| 33<br>34<br>35<br>36<br>37                | Funding          | 22 | Give the source of funding and the role of the funders for the present study and, if applicable, for the original study on which the present article is based                                                                                                                                                                                                                                                     | P13                           |

\*Give information separately for exposed and unexposed groups.

**Note:** An Explanation and Elaboration article discusses each checklist item and gives methodological background and published examples of transparent reporting. The STROBE checklist is best used in conjunction with this article (freely available on the Web sites of PLoS Medicine at <http://www.plosmedicine.org/>, Annals of Internal Medicine at <http://www.annals.org/>, and Epidemiology at <http://www.epidem.com/>). Information on the STROBE Initiative is available at <http://www.strobe-statement.org>.

# BMJ Open

## Validating a clinical laboratory parameters-based de-isolation algorithm for COVID-19 patients in the intensive care unit using viability- PCR: the CoLaIC multicentre cohort study protocol

|                                 |                                                                                                                                                                                                                                                                                                                                                                                                                                                                                                                                                                                                                                                                                                                                                                                                                                                                                                                                                                                                                                                                                                                                                                                                                                                                                                                                                                                                                                                                                                                                                                                                                                                                                                                                                    |
|---------------------------------|----------------------------------------------------------------------------------------------------------------------------------------------------------------------------------------------------------------------------------------------------------------------------------------------------------------------------------------------------------------------------------------------------------------------------------------------------------------------------------------------------------------------------------------------------------------------------------------------------------------------------------------------------------------------------------------------------------------------------------------------------------------------------------------------------------------------------------------------------------------------------------------------------------------------------------------------------------------------------------------------------------------------------------------------------------------------------------------------------------------------------------------------------------------------------------------------------------------------------------------------------------------------------------------------------------------------------------------------------------------------------------------------------------------------------------------------------------------------------------------------------------------------------------------------------------------------------------------------------------------------------------------------------------------------------------------------------------------------------------------------------|
| Journal:                        | <i>BMJ Open</i>                                                                                                                                                                                                                                                                                                                                                                                                                                                                                                                                                                                                                                                                                                                                                                                                                                                                                                                                                                                                                                                                                                                                                                                                                                                                                                                                                                                                                                                                                                                                                                                                                                                                                                                                    |
| Manuscript ID                   | bmjopen-2022-069455.R1                                                                                                                                                                                                                                                                                                                                                                                                                                                                                                                                                                                                                                                                                                                                                                                                                                                                                                                                                                                                                                                                                                                                                                                                                                                                                                                                                                                                                                                                                                                                                                                                                                                                                                                             |
| Article Type:                   | Protocol                                                                                                                                                                                                                                                                                                                                                                                                                                                                                                                                                                                                                                                                                                                                                                                                                                                                                                                                                                                                                                                                                                                                                                                                                                                                                                                                                                                                                                                                                                                                                                                                                                                                                                                                           |
| Date Submitted by the Author:   | 09-Feb-2023                                                                                                                                                                                                                                                                                                                                                                                                                                                                                                                                                                                                                                                                                                                                                                                                                                                                                                                                                                                                                                                                                                                                                                                                                                                                                                                                                                                                                                                                                                                                                                                                                                                                                                                                        |
| Complete List of Authors:       | <p>Schoenmakers, Tom; Zuyderland Medical Centre Sittard-Geleen, Department of Clinical Chemistry &amp; Hematology; Maastricht University Faculty of Health Medicine and Life Sciences, Nutrition and Translational Research In Metabolism (NUTRIM)</p> <p>van Bussel, Bas; Maastricht University Medical Centre+, Department of Intensive Care; Maastricht University Care and Public Health Research Institute</p> <p>Gorissen, Stefan H.M.; Zuyderland Medical Centre Sittard-Geleen</p> <p>van Loo, Inge ; Maastricht University Medical Centre+, Department of microbiology, infectious diseases and infection prevention; Maastricht University Care and Public Health Research Institute</p> <p>van Rosmalen, Frank; Maastricht University Medical Centre+, Department of Intensive Care; Maastricht University Faculty of Health Medicine and Life Sciences, Cardiovascular Research Institute Maastricht (CARIM)</p> <p>Verboeket-van de Venne, Wilhelmine P.H.G.; Zuyderland Medical Centre Sittard-Geleen, Department of Clinical Chemistry &amp; Hematology</p> <p>Wolffs, Petra F.G.; Maastricht UMC+, Department of medical microbiology, infectious diseases and infection prevention; Maastricht University Care and Public Health Research Institute</p> <p>Van Mook, WN; Maastricht UMC+, Department of intensive care; Maastricht University Faculty of Health Medicine and Life Sciences, School of Health Professions Education (SHE)</p> <p>Leers, Mathie; Zuyderland Medical Centre Heerlen, Clinical Chemistry &amp; Hematology; Maastricht University Faculty of Health Medicine and Life Sciences, Nutrition and Translational Research in Metabolism (NUTRIM) Consortium, CoLaIC ; Zuyderland Medical Centre Heerlen</p> |
| <b>Primary Subject Heading</b>: | Intensive care                                                                                                                                                                                                                                                                                                                                                                                                                                                                                                                                                                                                                                                                                                                                                                                                                                                                                                                                                                                                                                                                                                                                                                                                                                                                                                                                                                                                                                                                                                                                                                                                                                                                                                                                     |
| Secondary Subject Heading:      | Diagnostics, Haematology (incl blood transfusion), Infectious diseases                                                                                                                                                                                                                                                                                                                                                                                                                                                                                                                                                                                                                                                                                                                                                                                                                                                                                                                                                                                                                                                                                                                                                                                                                                                                                                                                                                                                                                                                                                                                                                                                                                                                             |
| Keywords:                       | COVID-19, INTENSIVE & CRITICAL CARE, Diagnostic microbiology < INFECTIOUS DISEASES, Clinical chemistry < PATHOLOGY, HAEMATOLOGY, Epidemiology < INFECTIOUS DISEASES                                                                                                                                                                                                                                                                                                                                                                                                                                                                                                                                                                                                                                                                                                                                                                                                                                                                                                                                                                                                                                                                                                                                                                                                                                                                                                                                                                                                                                                                                                                                                                                |
|                                 |                                                                                                                                                                                                                                                                                                                                                                                                                                                                                                                                                                                                                                                                                                                                                                                                                                                                                                                                                                                                                                                                                                                                                                                                                                                                                                                                                                                                                                                                                                                                                                                                                                                                                                                                                    |

1  
2  
3  
4  
5  
6  
7  
8  
9  
10  
11  
12  
13  
14  
15  
16  
17  
18  
19  
20  
21  
22  
23  
24  
25  
26  
27  
28  
29  
30  
31  
32  
33  
34  
35  
36  
37  
38  
39  
40  
41  
42  
43  
44  
45  
46  
47  
48  
49  
50  
51  
52  
53  
54  
55  
56  
57  
58  
59  
60

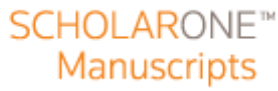

1  
2  
3  
4 Validating a clinical laboratory parameters-  
5 based de-isolation algorithm for COVID-19  
6 patients in the intensive care unit using viability-  
7 PCR: the CoLaIC multicentre cohort study  
8 protocol  
9  
10  
11  
12  
13  
14  
15  
16  
17  
18  
19  
20  
21  
22  
23  
24

25 Tom Schoenmakers<sup>1,2</sup>, Bas C.T. van Bussel<sup>3,4,5</sup>, Stefan H.M. Gorissen<sup>6</sup>, Inge H.M. van Loo<sup>4,7</sup>,  
26 Frank van Rosmalen<sup>3,5</sup>, Wilhelmine P.H.G. Verboeket-van de Venne<sup>1</sup>, Petra F.G. Wolffs<sup>4,7</sup>, Walther  
27 N.K. A. van Mook<sup>3,8</sup>, Mathie P.G. Leers<sup>1,2,3</sup>, on behalf of the CoLaIC-consortium  
28  
29  
30  
31  
32  
33

34 <sup>1</sup> Department of Clinical Chemistry & Hematology, Zuyderland Medical Centre, Sittard-  
35 Geleen/Heerlen, the Netherlands  
36  
37

38 <sup>2</sup> School of Nutrition and Translational Research in Metabolism (NUTRIM), Maastricht University,  
39 Maastricht, the Netherlands  
40  
41  
42

43 <sup>3</sup> Department of Intensive Care, Maastricht University Medical Centre +, Maastricht, the  
44 Netherlands  
45  
46  
47

48 <sup>4</sup> Care and Public Health Research Institute (CAPHRI), Maastricht University, Maastricht, the  
49 Netherlands  
50  
51  
52

53 <sup>5</sup> Cardiovascular Research Institute Maastricht (CARIM), Maastricht University, Maastricht, the  
54 Netherlands  
55  
56  
57

58 <sup>6</sup> Zuyderland Academy, Zuyderland Medical Centre, Sittard-Geleen/Heerlen, the Netherlands  
59  
60

1  
2  
3  
4 <sup>7</sup> Department of Medical Microbiology, Infectious diseases and Infection prevention, Maastricht  
5  
6 University Medical Centre +, Maastricht, the Netherlands  
7

8 <sup>8</sup> School of Health Professions Education (SHE), Maastricht University, Maastricht, the Netherlands  
9  
10

11  
12  
13 Word count: 3337  
14  
15  
16

17  
18 Keywords: viability-PCR, COVID-19, SARS-CoV-2, CoLab, CoLaIC, study protocol, viral culture,  
19 host response, intensive care  
20  
21  
22

23  
24 Address for correspondence  
25

26 Tom Schoenmakers  
27

28  
29 Department of Clinical Chemistry and Hematology  
30

31 Zuyderland Medical Centre, Sittard-Geleen  
32

33  
34 Dr. H. van der Hoffplein 1, 6162 BG Sittard-Geleen  
35

36 The Netherlands  
37

38 [t.schoenmakers@zuyderland.nl](mailto:t.schoenmakers@zuyderland.nl)  
39  
40  
41  
42  
43  
44  
45  
46  
47  
48  
49  
50  
51  
52  
53  
54  
55  
56  
57  
58  
59  
60

## Abstract

### Introduction

To investigate whether biochemical and haematological changes due to the patient's host response (CoLab algorithm) in combination with a *Severe Acute Respiratory Syndrome-CoronaVirus-2* (SARS-CoV-2) viability-PCR (v-PCR) can be used to determine when a COVID-19 patient is no longer infectious.

We hypothesise that the CoLab algorithm in combination with v-PCR can be used to determine whether or not a COVID-19 patient is infectious to facilitate the safe release of COVID-19 patients from isolation.

### Methods and analysis

This study consists of three parts using three different cohorts of patients. All three cohorts contain clinical, vital and laboratory parameters, as well as logistic data related to isolated COVID-19 patients, with a focus on ICU stay. The first cohort will be used to develop an algorithm for the course of the biochemical and haematological changes of the COVID-19 patient host response. Simultaneously, a second prospective cohort will be used to investigate the algorithm derived in the first cohort, with daily measured laboratory parameters, next to conventional SARS-CoV-2 RT-PCRs, as well as v-PCR, to confirm the presence of intact SARS-CoV-2 particles in the patient. Finally, a third multi-centre cohort, consisting of retrospectively collected data from COVID-19 patients admitted to the ICU will be used to validate the algorithm.

### Ethics and dissemination

This study was approved by the Medical Ethics Committee from MUMC+ (cohort I: 2020-1565/3 00 523) and Zuyderland MC (cohort II and III: METCZ20200057). All patients will be required to provide

1  
2  
3  
4  
5  
6  
7  
8  
9  
10  
11  
12  
13  
14  
15  
16  
17  
18  
19  
20  
21  
22  
23  
24  
25  
26  
27  
28  
29  
30  
31  
32  
33  
34  
35  
36  
37  
38  
39  
40  
41  
42  
43  
44  
45  
46  
47  
48  
49  
50  
51  
52  
53  
54  
55  
56  
57  
58  
59  
60

informed consent. Results from this study will be disseminated via peer-reviewed journals and congress/consortium presentations.

For peer review only

## Article summary

### Strengths and limitations of this study

#### Strengths:

- The algorithm/model is based on routinely tested blood parameters and standardised laboratory tests
- Multicentre approach with a good distribution of hospitals covering various regions of the Netherlands
- Large temporal range of the retrospective cohort III enables model validation for SARS-CoV-2 virus variants of concern (VOC)

#### Limitations:

- Viability-PCR is not performed in cohorts I and III
- The focus is limited to (de-)isolation of COVID-19 patients in the ICU



## Introduction

The COVID-19 pandemic is globally disruptive regarding the continuation of regular healthcare. Hospitalised COVID-19 patients need to be isolated and separated from the non-COVID-19 patient population. This aspect paired with the large influx of COVID-19 patients and limited availability of hospital and isolation beds exerts enormous pressure on regular non-COVID-19 healthcare, but also on healthcare professionals. In addition, the need for treatment and support in an intensive care unit (ICU) for a substantial subset of COVID-19 patients and the limited availability in the number of ICU beds contributes to these effects. De-isolation as early as possible could improve the quality of life for the affected patients, as well as decrease the pressure on the healthcare system and its professionals.

Several study protocols described methods to determine if COVID-19-infected patients can be de-isolated: based on clinical signs[1], using RT-PCR[2], or with rapid antigen tests[3]. Reverse transcriptase-polymerase chain reaction (RT-PCR) testing is currently the gold standard to determine whether a patient is SARS-CoV-2 positive[4]. To de-isolate a COVID-19 ICU patient in the Netherlands two consecutive negative PCR tests are required. However, it can be hypothesised that SARS-CoV-2 RT-PCR positivity does not relate per se with the actual presence of intact, infectious viruses[5, 6]. Because RT-PCR detects nucleic acids and does not make a distinction between an intact infectious virus and non-intact non-infectious viral particles, this may result in persistently positive RT-PCR test results, which hampers timely de-isolation[4].

An alternative RT-PCR-based method to detect intact viral particles is to eliminate incomplete viral particles and RNA remnants before the actual RT-PCR is performed. Propidium monoazide (PMA) is a dye that binds irreversibly to (deoxy)ribonucleic acid (DNA/RNA) and cannot penetrate cell membranes[7]. Pre-treatment of a sample with PMA results in the amplification of only intact particles. This so-called viability-PCR (v-PCR) has been shown to successfully measure the number

1  
2  
3 of viable micro-organisms, such as *Chlamydia trachomatis*, in a sample[8]. In the present study, we  
4  
5 want to adapt and validate this concept for the detection of intact viable RNA-containing SARS-CoV-  
6  
7 2 virus. Preliminary data have confirmed its applicability for SARS-CoV-2 diagnostics[9]. The  
8  
9 adapted v-PCR will be used in the study herein presented to confirm the state of viability and thus  
10  
11 potential infectivity of SARS-CoV-2 in patients.  
12  
13

14  
15 An alternative approach is to assess the host response of the suspected patient to the virus. One of  
16  
17 the methods to assess the host response to SARS-CoV-2 is the CoLab score. This score has been  
18  
19 developed using an adaptive LASSO-regression technique and requires the input of the numerical  
20  
21 results of ten blood parameters and the age of the patient[10]. The required parameters are blood  
22  
23 tests that are requested frequently and routinely for emergency room (ER) as well as ICU patients.  
24  
25 This score has previously been developed and validated and has been implemented in the ER  
26  
27 departments of two large Dutch teaching hospitals, with very high negative predictive value (99.5%)  
28  
29 and sensitivity (96.9%)[10]. The score is also utilised to exclude COVID-19 in a screening setting for  
30  
31 healthcare workers with COVID-19 suspected complaints[11].  
32  
33  
34  
35

36  
37 Preliminary analysis of serially collected data in a pilot set of ICU patients showed a decrease in the  
38  
39 CoLab score resulting in normalization before a patient is discharged (unpublished data). For that  
40  
41 reason, we hypothesise that the biochemical and haematological changes in blood parameters  
42  
43 necessary to calculate the CoLab score rapidly return to normal values after the host clears the  
44  
45 SARS-CoV-2 infection.  
46  
47  
48  
49

50  
51 This study aims to investigate whether biochemical and haematological changes due to the patient's  
52  
53 host response (CoLab algorithm) and/or the v-PCR can be reliably and validly used to determine, at  
54  
55 an earlier stage in comparison with a conventional SARS-CoV-2 RT-PCR, when a COVID-19 patient  
56  
57 is no longer infectious.  
58  
59  
60

## Methods and analysis

### Cohorts

This study is composed of three cohorts, two prospective cohorts (local and regional) and one retrospective cohort (national), which all consist of serially (i.e. daily) collected clinical and laboratory variables of COVID-19 patients in isolation at an ICU. We intend to include all patients admitted to one of our COVID-19 ICU isolation rooms.

More specifically, the three different cohorts will be used to study the CoLab score over time (local cohort I), to determine a cut-off point related to the intact infectious viral load (regional cohort II), and to validate the CoLab algorithm (national cohort III) on a national level with an external dataset (Figure 1). While not developed specifically for models using machine learning [12], the study will follow the guidelines of the Transparent reporting of a multivariable prediction model for individual prognosis or diagnosis (TRIPOD).[13]

#### Local single-centre prospective cohort (I)

The first, single-centre, local cohort is the prospective Maastricht Intensive Care COVID (MaastrICChT) cohort, previously described by Tas et al[14]. The CoLab score is calculated for each time-point using this comprehensively characterised cohort[14-20]. In addition, the daily Sequential Organ Failure Assessment (SOFA)[15, 19] scores are available as well as all conventional SARS-CoV-2 RT-PCRs that are measured within this cohort. The aim is to investigate the development of the CoLab score over time. To possibly de-isolate patients, the CoLab score should at least decrease over time in a way that is independent of disease severity and similar for survivors and non-survivors. Therefore, we hypothesise that the CoLab score decreases over time in both survivors and non-

1  
2  
3 survivors, in a way that is independent of disease severity over time measured by serial SOFA  
4  
5 scores. To have an additional value above conventional RT-PCR-based de-isolation, the decrease  
6  
7 in CoLab score should occur before de-isolation by RT-PCR is done. We hypothesise that a CoLab  
8  
9 score decrease is present before RT-PCR-based de-isolation. We will explore the association  
10  
11 between CoLab score over time and the moment of RT-PCR-driven de-isolation. If the CoLab score  
12  
13 behaves over time in the ICU as hypothesised above, the next step is to quantify what decrease in  
14  
15 CoLab score over time (or what cut-of CoLab score per day) precedes the transition from RT-PCR  
16  
17 positive to negative. This decrease in CoLab score over time can be used to develop a diagnostic  
18  
19 prediction model for de-isolation. Whether this prediction model can be used as the gold standard  
20  
21 for de-isolation (CoLab prediction model alone, or in combination with conventional SARS-CoV-2  
22  
23 RT-PCR and/or v-PCR) is part of this study protocol.  
24  
25  
26  
27  
28  
29

### 30 Regional dual-centre prospective cohort (II)

31  
32 In the second part, we hypothesise that excluding infectiousness, contributing to de-isolation can be  
33  
34 done more accurately by using v-PCR instead of RT-PCR. A second prospectively collected, dual  
35  
36 centre, regional cohort of COVID-19 patients from the ICU department of both Zuyderland Medical  
37  
38 Centre and Maastricht University Medical Centre + (MUMC+) will be used to evaluate the usability  
39  
40 of the v-PCR for the above-mentioned hypothesis. Inclusion of all consecutive COVID-19 ICU  
41  
42 patients will be pragmatic based on the development of the pandemic and related incidence of ICU  
43  
44 admission, starting from 1<sup>st</sup> November 2021. We aim to include a minimum of 90 patients. In this  
45  
46 cohort, serial data related to the CoLab algorithm will be collected daily. In addition, both  
47  
48 conventional (RT-PCR) and v-PCR testing for the detection of SARS-CoV-2 will be performed three  
49  
50 times a week. The aim of this regional cohort (II) is to determine a cut-off point or a certain decrease  
51  
52 in CoLab score over time that precedes the transition from positive to negative RT-PCR and v-PCR  
53  
54 results.  
55  
56  
57  
58  
59  
60

### National multi-centre retrospective cohort (III)

For the third part of the study, a retrospectively collected multi-centre, national cohort will be used.

This retrospective cohort will consist of ICU data derived from four other hospitals located in the Netherlands. This dataset will contain serially collected data necessary for determining the CoLab score (ten blood parameters and age, see below) next to conventional SARS-CoV-2 RT-PCR results. This cohort will be used to determine whether the CoLab algorithm developed and validated in cohorts I and II in specific contexts are generalisable to and valid in other contexts (cohort III). An additional aim is to test the CoLab algorithm for different variants of concern (VOC) of SARS-CoV-2 (see also below). For this purpose, we will use data from all COVID-19-positive ICU patients between March 2020 and September 2022 (estimated at least 250 patients per participating centre).

### Context and setting

Data from six hospitals will be used to create the different cohorts of this study. An overview of the number of hospital and ICU beds per participating hospital and per cohort is shown in Supplemental Table 1.

The local single-centre cohort I aims to use data obtained at MUMC+ (27 ICU and 6 high/medium care beds in the pre-pandemic era), a university medical centre located in the southern part of the Netherlands. During the COVID-19 pandemic, a maximum of 52 ICU beds were available for COVID-19 patients, and 12 for non-COVID-19 patients. Using this local cohort, the CoLab score will be observed over time.

The regional dual-centre cohort II consists of data from ICU patients from both Zuyderland MC (36 ICU beds) and MUMC+. These two hospitals are both located in Limburg in the Netherlands with an existing close cooperation for clinical purposes. Both hospitals are large teaching hospitals. This

1  
2  
3 regional cohort will be used to assess whether the CoLab score can be used to determine whether  
4 patients are SARS-CoV-2 free according to the results of the v-PCR.  
5  
6  
7

8  
9 The national, multi-centre cohort III consists of retrospectively collected data from four additional  
10 hospitals: Leiden UMC, Radboud UMC, Medical Centre Leeuwarden and Catharina Hospital. The  
11 hospitals in this cohort are located in separate provinces leading to a good geographical  
12 representation of the national spread of the Dutch COVID-19 patient population. Since Leiden UMC  
13 and Radboud UMC are university medical centres and Medical Centre Leeuwarden and Catharina  
14 Hospital are large teaching hospitals, both hospital types are represented equally. This national  
15 cohort will serve to further validate the model created using cohorts I and II in broader contexts (see  
16 Supplemental Table 1 for details of the different hospitals contributing to the consortium).  
17  
18  
19  
20  
21  
22  
23  
24  
25  
26  
27

### 28 Patient and public involvement

29  
30 The national patient organisation for lung diseases (Longfonds) has a panel of patients who have  
31 experienced isolation process due to COVID-19 in the ICU. These patients have read the study  
32 protocol and gave advice that has been implemented in the protocol. The patient panel will also be  
33 involved during the study to provide feedback regarding the execution of this study and to provide  
34 input for the implementation of the results.  
35  
36  
37  
38  
39  
40  
41  
42  
43

### 44 Inclusion and exclusion criteria

45  
46 For the three cohorts, the same inclusion and exclusion criteria are applicable. All patients with a  
47 proven primary and/or secondary SARS-CoV-2 infection are eligible to participate in the study.  
48  
49 Exclusion criteria include only patients with extreme laboratory values (more than 10 times the  
50 standard deviation).  
51  
52  
53  
54  
55  
56  
57  
58  
59  
60

## Parameters

### Blood parameters

Blood samples are used to determine a variety of biochemical and haematological parameters in routine diagnostics and disease monitoring, from hospitalisation until discharge of a COVID-19 patient. This has led to a large accumulation of blood-related biomarker data. Previous studies found biochemical and haematological changes measured in peripheral blood samples that characterised SARS-CoV-2 infection[21-23]. For instance, in the early stage of COVID-19 disease, haematological changes in immunocompetent leukocytes are associated with a more severe disease progression[23].

### CoLab score

The CoLab score[10] uses the erythrocytes [ $10^{12}/L$ ], leukocytes [ $10^9/L$ ], eosinophils [ $10^9/L$ ], basophils [ $10^9/L$ ],  $\log_{10}$  of bilirubin [ $\mu\text{mol}/L$ ],  $\log_{10}$  of lactate dehydrogenase (LD) [ $U/L$ ],  $\log_{10}$  of alkaline phosphatase (ALP) [ $IU/L$ ],  $\log_{10}$  of  $\gamma$ -glutamyltransferase ( $\gamma$ -GT) [ $U/L$ ], albumin [ $g/L$ ], C-reactive protein (CRP) [ $mg/L$ ], and age [years accurate to two decimals]. These parameters are routinely measured in ICU patients and can be automatically extracted from the laboratory information system. The CoLab algorithm yields a score in the range of -20 to 5 (the so-called CoLab-linear predictor[10]), with a lower score associated with the exclusion of a SARS-CoV-2 infection and a higher score reflecting an increased risk of SARS-CoV-2 infection.

In an emergency department study population, a cut-off of the CoLab linear predictor was determined to classify patients as being COVID-19 negative. This cut-off was originally set to -5.83 to minimise the amount of false negative results, with a score below -5.83 being negative for COVID-19[10]. How the CoLab-algorithm corresponds with a negligible intact infectious viral load (see the section below)

1  
2  
3 is part of the present study: a cut-off or a certain decrease in CoLab-score over time. The CoLab  
4  
5 score will be calculated daily for all participating patients, either prospectively or retrospectively.  
6  
7

### 8 9 Clinical parameters

10  
11 In addition to the blood parameters, the clinical variables of patients are collected in the different  
12  
13 cohorts. These include co-morbidities and clinical scores as well as ventilation, biometric, and  
14  
15 physical parameters[15-20]. One clinical score of interest is the Sequential Organ Failure  
16  
17 Assessments (SOFA) score. This score has previously been associated with the survival chance of  
18  
19 mechanically ventilated COVID-19 patients[15]. A decrease in SOFA score is associated with  
20  
21 survival. This sequentially determined SOFA score is measured over time and will be used to  
22  
23 investigate whether the association between the CoLab score over time and infectiousness is  
24  
25 independent of the SOFA score. This will provide evidence whether the CoLab score operationalises  
26  
27 a different dimension of the host response, beyond multi-organ failure, and in an independent way  
28  
29 with regard to survival. This will generate evidence whether the CoLab score generates new  
30  
31 information, beyond existing scores and has potential for diagnosis of de-isolation.  
32  
33  
34  
35  
36

### 37 38 Viability PCR (v-PCR)

39  
40 A v-PCR[9] is performed to assess the presence of intact viruses and will be compared with the  
41  
42 conventional SARS-CoV-2 RT-PCR test[24]. Briefly, nasopharyngeal samples are collected in viral  
43  
44 transport medium (VTM). The VTM sample is divided into two parts. One part is directly used for a  
45  
46 conventional RT-PCR for SARS-CoV-2. For the v-PCR propidium monoazide (PMA) is added to the  
47  
48 other half of the VTM sample[25]. After pretreating this sample it is used for the v-PCR. (see also  
49  
50 Figure 2). The difference in cycle-time values (Ct) between these two PCR tests will be reported as  
51  
52  $\Delta Ct$ , which is a reliable indication of the amount of intact virus in the sample.  
53  
54  
55  
56  
57  
58  
59  
60



1  
2  
3 The implementation of the viability PCR in the routine diagnostics would add some processing time  
4  
5 to the existing SARS-CoV-2 PCR protocols. The v-PCR method is currently not (yet) automated and  
6  
7 might as such not fit in every COVID-19 diagnostic workflow. However, the added value of the v-  
8  
9 PCR would be the determination of complete virus particles.  
10  
11

### 12 13 Variants of Concern (VOC) 14

15  
16 Due to the rapid mutation potential observed in viruses, it is necessary to ensure the robustness of  
17  
18 the CoLab algorithm to variants of concern of this SARS-CoV-2 virus (VOCs). This study will address  
19  
20 VOC retrospectively as well as prospectively. Cohort III, spanning from March 2020 until the present,  
21  
22 contains data on the Wuhan original SARS-CoV-2 and data from at least three VOC. Demographic  
23  
24 studies showed that during this period three VOC of the SARS-CoV-2 were present next to the  
25  
26 original SARS-CoV-2 virus (2020/03 to 2021/01): the B.1.1.7 alpha-variant (2021/02 to 2021/06), the  
27  
28 B.1.617.2 delta-variant (2021/07 to 2021/12), and the B.1.1.529 omicron-variant (2022/01 to  
29  
30 present)[26]. We use time periods to characterise VOC in cohort III. In contrast, in cohort II VOCs  
31  
32 will be measured with variant-specific Next Generation Sequencing[27].  
33  
34  
35  
36  
37

### 38 39 Statistical analysis 40

41  
42 Analyses will be performed with R version 4.2.0 and with RStudio version 4.2.0 [28], combined with  
43  
44 the packages Tidyverse [29], lme4 [30], MICE[31], MissForest[32] and Caret[33]. Missing values for  
45  
46 numerical variables will be imputed using multiple imputations by chained equations (MICE).[31]  
47  
48 Mixed-effects regression model analysis will be used to observe the CoLab score over time (cohort  
49  
50 I), to determine whether the CoLab score is independent of survival and SOFA score (cohort I), and  
51  
52 to determine the association between the CoLab score and the v-PCR (potentially cohort I and  
53  
54 particularly cohort II). The reason for this is to determine the maximal cut-off value for the CoLab  
55  
56 score to predict negligible viral load. If necessary, the CoLab model can be adjusted using LASSO  
57  
58  
59  
60

1  
2  
3 regression to determine the optimal parameters used in this score. Finally, the CoLab model will be  
4  
5 validated using Receiver Operator Curves (ROC), confusion matrices, and calibration curves in the  
6  
7 analysis of cohort III.  
8  
9

10  
11 For local cohort I, a prospective serially collected dataset of 390 COVID-19 positive patients admitted  
12  
13 to the ICU of MUMC+ is available. This also includes a subset of immunocompromised patients  
14  
15 (n=60). Adding interaction terms with immunocompromised groups to the mixed models will test  
16  
17 whether the development of the CoLab score over time differs for these patients compared to non-  
18  
19 immunocompromised patients. A similar approach will be taken to investigate whether results for  
20  
21 sex differ.  
22  
23  
24  
25

26 For regional cohort II, a negative v-PCR will be considered as the moment when a patient is not  
27  
28 infectious anymore. To assess whether a normalised CoLab-score can pinpoint this moment, we  
29  
30 expect that 95% of the patients will have a normalised CoLab-score within a time frame of two days  
31  
32 before and after the negative v-PCR. Using this proportion of 95% with a total width of the confidence  
33  
34 interval of 10%, and an alpha of 5%, we need to include at least 88 new COVID-19 patients admitted  
35  
36 to the ICU for mechanical ventilation.  
37  
38  
39  
40

41 For national cohort III, we aim to include serially collected data from all COVID-19-positive patients  
42  
43 admitted to the ICU of the other participating hospitals for validation.  
44  
45  
46

#### 47 Sample size calculation

48  
49 For the local cohort, as stated above, a prospectively serially collected dataset of 390 COVID-19  
50  
51 positive patients admitted to the ICU of MUMC are already available This includes also a subset of  
52  
53 immunocompromised patients (n=60). If hypothesised that the course of the CoLab-score does not  
54  
55 differ between immunocompromised vs non-immunocompromised COVID-19 patients (the mean  
56  
57 difference between these two groups=0), and using a power of 80%, an alpha of 0.05, a standard  
58  
59  
60

1  
2  
3 deviation in COVID-19+ LP of 1,5 and a margin of  $\pm 1$ , then we need to analyse at least 39 patients  
4  
5 per group (in our dataset we have data available of 60 immunocompromised patients).  
6  
7

8  
9 For the regional cohort (prospective), if we consider a negative v-PCR as the moment when a patient  
10  
11 is not infectious anymore, we can assess whether a normalised CoLab-score can indicate this  
12  
13 moment. Here we expect that 95% of the patients will have a normalised CoLab-score within a time  
14  
15 frame of two days before and after the negative v-PCR. Using this proportion of 95% with a total  
16  
17 width of the confidence interval of 10%, and an alpha of 5%, we need to include at least 88 new  
18  
19 COVID-19 patients admitted to the ICU for mechanical ventilation.  
20  
21  
22

23  
24 For the national cohort (retrospective), we want to include serially collected datasets of at least 250  
25  
26 COVID-19+ patients admitted to the ICU of the other participating hospitals for the purpose of  
27  
28 validation. These data are already available in the different laboratory information systems of the  
29  
30 different hospitals, but needed to be extracted, collected and data needed to be cleaned  
31  
32  
33

### 34 35 36 37 Ethics and dissemination

38  
39 Ethical approval for study part I (METC nr: 2020-1565/3 00 523) was granted by the Medical Ethical  
40  
41 Committee from MUMC+ (Maastricht, the Netherlands). During the pandemic, the board of directors  
42  
43 of MUMC+ adopted a policy to inform patients and ask for their consent to use the collected data  
44  
45 and to store blood samples for COVID-19 research purposes. The Medical Ethical Committee from  
46  
47 Zuyderland Medical Centre (Heerlen/Sittard-Geleen, the Netherlands) approved study parts II  
48  
49 (METCZ20210091-CoLaIC study) and III (METCZ20200057). The study is conducted in accordance  
50  
51 with the Declaration of Helsinki. Patients will be informed about the purpose and procedures of the  
52  
53 study via verbal and written information and informed consent will be obtained. If the patient is not  
54  
55 able to communicate him/herself, e.g., due to ICU treatment, the next of kin will be approached.  
56  
57  
58  
59  
60

1  
2  
3 Patients will be asked for consent later, when the patient has recovered. Results from this study will  
4  
5 be disseminated via peer-reviewed journals, congress presentations, and consortium presentations.  
6  
7  
8 The data generated will also be available upon request in a public, open-access repository.  
9  
10  
11  
12  
13  
14

## 15 Collaborators

16  
17  
18 The members of the Dutch CoLaIC consortium are:

19  
20  
21 Stephanie M.C. Ament (MUMC+, Maastricht); M. Sesmu Arbous (LUMC, Leiden); Otto Bekers  
22  
23 (MUMC+, Maastricht); Miranda van Berkel (Radboud UMC, Nijmegen); Arjen-Kars Boer (Catharina  
24  
25 Hospital, Eindhoven); Dirck W. van Dam (Zuyderland MC, Sittard-Geleen/Heerlen); Ruben Deneer  
26  
27 (Catharina Hospital, Eindhoven); William P.T.M. van Doorn (MUMC+, Maastricht); Tom P. Dormans  
28  
29 (Zuyderland MC, Sittard-Geleen/Heerlen); Silvia M.A.A. Evers (Maastricht University, Maastricht);  
30  
31 Tim Frenzel (Radboud UMC, Nijmegen); Judith Gillis (LUMC, Leiden); Iwan C.C. van der Horst  
32  
33 (MUMC+, Maastricht); W. Nadia H. Koek (Medical Centre Leeuwarden, Leeuwarden); Kitty C.F.M.  
34  
35 Linssen (Zuyderland MC, Sittard-Geleen); Steven J.R. Meex (MUMC+, Maastricht); Guy J.M.  
36  
37 Mostard (Zuyderland MC, Sittard-Geleen); Remy L.M. Mostard (Zuyderland MC, Sittard-Geleen);  
38  
39 Luuk C. Otterspoor (Catharina Hospital, Eindhoven); Natal A.W. van Riel (Technical University,  
40  
41 Eindhoven); Frans Stals (Zuyderland MC, Sittard-Geleen); Albert Wolthuis (Medical Centre  
42  
43 Leeuwarden, Leeuwarden).  
44  
45  
46  
47  
48  
49

## 50 Author contributions

51  
52 Study design: BvB, IvL, PW, WvM and MPGL; Development of the study protocol: BvB, IvL, PW,  
53  
54 WvM, SG, WV and MPGL; Patient recruitment: BvB and WvM; Data collection: TS and FvR;  
55  
56  
57 Manuscript preparation: TS, BvB, PW, IvL, WV, WvM and MPGL. The members of the CoLaIC-  
58  
59  
60

1  
2  
3 consortium co-designed the study protocol, selected potential participants, assisted in their  
4 recruitment, collected data, and set up, prepared and hosted COVID-19 databases. All authors read  
5 and approved the final manuscript.  
6  
7  
8  
9

## 10 11 12 Funding

13  
14  
15  
16 This publication is part of the CoLaIC project with project number 10430102110002 of the COVID-  
17 19 research program which is (partly) financed by the Netherlands Organisation for Health Research  
18 and Development (ZonMw).  
19  
20  
21  
22

## 23 24 25 Competing interests

26  
27  
28 None declared  
29  
30

## 31 32 33 Patients and public involvement

34  
35 Patients were and will be involved in the design and dissemination plans of this research.  
36  
37

## 38 39 40 Patient consent for publication

41  
42 Not applicable  
43  
44  
45  
46  
47

## 48 49 50 Orcid iD

|                               |                     |
|-------------------------------|---------------------|
| 51<br>52 Bas C.T. van Bussel  | 0000-0003-1621-7848 |
| 53<br>54 Stefan H.M. Gorissen | 0000-0003-3737-9053 |
| 55<br>56 Math P.G. Leers      | 0000-0001-5186-5600 |

57  
58  
59  
60

1  
2  
3 Inge H.M. van Loo 0000-0002-5960-4357  
4  
5  
6 Walther N.K.A. van Mook 0000-0003-2398-8878  
7  
8  
9 Frank van Rosmalen 0000-0002-9522-3711  
10  
11  
12 Tom Schoenmakers 0000-0002-1576-7832  
13  
14  
15 Wilhelmine P.H.G. Verboeket-van de Venne 0000-0003-4980-0116  
16  
17  
18 Petra Wolffs 0000-0002-5326-3985  
19  
20  
21  
22  
23  
24  
25  
26  
27  
28  
29  
30  
31  
32  
33  
34  
35  
36  
37  
38  
39  
40  
41  
42  
43  
44  
45  
46  
47  
48  
49  
50  
51  
52  
53  
54  
55  
56  
57  
58  
59  
60

## References

1. Kang, S.W., et al., *Clinical scoring system to predict viable viral shedding in patients with COVID-19*. J Clin Virol, 2022. **157**: p. 105319.
2. Syue, L.S., et al., *De-isolation criterion of real-time PCR test in patients with COVID-19: Two or three consecutive negative nasopharyngeal swabs?* J Microbiol Immunol Infect, 2021. **54**(1): p. 136-138.
3. Alshukairi, A.N., et al., *De-isolation of vaccinated COVID-19 health care workers using rapid antigen detection test*. J Infect Public Health, 2022. **15**(8): p. 902-905.
4. Moghadas, S.M., et al., *The implications of silent transmission for the control of COVID-19 outbreaks*. Proc Natl Acad Sci U S A, 2020. **117**(30): p. 17513-17515.
5. Marik, P.E., et al., *A scoping review of the pathophysiology of COVID-19*. Int J Immunopathol Pharmacol, 2021. **35**: p. 20587384211048026.
6. van Kampen, J.J.A., et al., *Duration and key determinants of infectious virus shedding in hospitalized patients with coronavirus disease-2019 (COVID-19)*. Nat Commun, 2021. **12**(1): p. 267.
7. Nocker, A., C.Y. Cheung, and A.K. Camper, *Comparison of propidium monoazide with ethidium monoazide for differentiation of live vs. dead bacteria by selective removal of DNA from dead cells*. J Microbiol Methods, 2006. **67**(2): p. 310-20.
8. Janssen, K.J., et al., *Viability-PCR Shows That NAAT Detects a High Proportion of DNA from Non-Viable Chlamydia trachomatis*. PLoS One, 2016. **11**(11): p. e0165920.
9. Hong, W., et al., *Rapid determination of infectious SARS-CoV-2 in PCR-positive samples by SDS-PMA assisted RT-qPCR*. Sci Total Environ, 2021. **797**: p. 149085.
10. Boer, A.K., et al., *Development and validation of an early warning score to identify COVID-19 in the emergency department based on routine laboratory tests: a multicentre case-control study*. BMJ Open, 2022. **12**(8): p. e059111.
11. Leers, M.P.G., et al., *Use of an algorithm based on routine blood laboratory tests to exclude COVID-19 in a screening-setting of healthcare workers*. PLoS One, 2022. **17**(6): p. e0270548.
12. Collins, G.S. and K.G.M. Moons, *Reporting of artificial intelligence prediction models*. Lancet, 2019. **393**(10181): p. 1577-1579.
13. Collins, G.S., et al., *Transparent reporting of a multivariable prediction model for individual prognosis or diagnosis (TRIPOD): the TRIPOD statement*. BMJ, 2015. **350**: p. g7594.
14. Tas, J., et al., *Serial measurements in COVID-19-induced acute respiratory disease to unravel heterogeneity of the disease course: design of the Maastricht Intensive Care COVID cohort (MaastrICht)*. BMJ Open, 2020. **10**(9): p. e040175.

15. Bels, J.L.M., et al., *Decreased serial scores of severe organ failure assessments are associated with survival in mechanically ventilated patients; the prospective Maastricht Intensive Care COVID cohort*. J Crit Care, 2021. **62**: p. 38-45.
16. Ghossein, M.A., et al., *Serial Assessment of Myocardial Injury Markers in Mechanically Ventilated Patients With SARS-CoV-2 (from the Prospective MaastrICht Cohort)*. Am J Cardiol, 2022. **170**: p. 118-127.
17. Heines, S.J.H., et al., *Pulmonary pathophysiology development of COVID-19 assessed by serial Electrical Impedance Tomography in the MaastrICht cohort*. Sci Rep, 2022. **12**(1): p. 14517.
18. Hulshof, A.M., et al., *Serial EXTEM, FIBTEM, and tPA Rotational Thromboelastometry Observations in the Maastricht Intensive Care COVID Cohort-Persistence of Hypercoagulability and Hypofibrinolysis Despite Anticoagulation*. Front Cardiovasc Med, 2021. **8**: p. 654174.
19. Martens, B., et al., *Coronary Artery Calcifications Are Associated With More Severe Multiorgan Failure in Patients With Severe Coronavirus Disease 2019 Infection: Longitudinal Results of the Maastricht Intensive Care COVID Cohort*. J Thorac Imaging, 2022. **37**(4): p. 217-224.
20. Mulder, M.M.G., et al., *Serial markers of coagulation and inflammation and the occurrence of clinical pulmonary thromboembolism in mechanically ventilated patients with SARS-CoV-2 infection; the prospective Maastricht intensive care COVID cohort*. Thromb J, 2021. **19**(1): p. 35.
21. Linssen, J., et al., *A novel haemocytometric COVID-19 prognostic score developed and validated in an observational multicentre European hospital-based study*. Elife, 2020. **9**.
22. Lippi, G. and M. Plebani, *The critical role of laboratory medicine during coronavirus disease 2019 (COVID-19) and other viral outbreaks*. Clin Chem Lab Med, 2020. **58**(7): p. 1063-1069.
23. Martens, R.J.H., et al., *Hemocytometric characteristics of COVID-19 patients with and without cytokine storm syndrome on the sysmex XN-10 hematology analyzer*. Clin Chem Lab Med, 2021. **59**(4): p. 783-793.
24. Corman, V.M., et al., *Detection of 2019 novel coronavirus (2019-nCoV) by real-time RT-PCR*. Euro Surveill, 2020. **25**(3).
25. Nkuipou-Kenfack, E., et al., *Improving efficiency of viability-PCR for selective detection of live cells*. J Microbiol Methods, 2013. **93**(1): p. 20-4.
26. RIVM, t.N., *Variants of the coronavirus SARS-CoV-2 (Dutch: varianten van het coronavirus SARS-CoV-2)*. 2022.



- 1  
2  
3  
4  
5  
6  
7  
8  
9  
10  
11  
12  
13  
14  
15  
16  
17  
18  
19  
20  
21  
22  
23  
24  
25  
26  
27  
28  
29  
30  
31  
32  
33  
34  
35  
36  
37  
38  
39  
40  
41  
42  
43  
44  
45  
46  
47  
48  
49  
50  
51  
52  
53  
54  
55  
56  
57  
58  
59  
60
27. Gorgels, K.M.F., et al., *Linked nosocomial COVID-19 outbreak in three facilities for people with intellectual and developmental disabilities due to SARS-CoV-2 variant B.1.1.519 with spike mutation T478K in the Netherlands*. BMC Infect Dis, 2022. **22**(1): p. 139.
  28. (2020), R.C.T. *R: A language and environment for statistical computing*. R Foundation for Statistical Computing,. 2022; Available from: <http://www.r-project.org/index.html>.
  29. Wickham, H., et al., *Welcome to the {tidyverse}*. Journal of Open Source Software, 2019. **4**: p. 1686.
  30. Bates, D., et al., *Fitting Linear Mixed-Effects Models Using lme4*. Journal of Statistical Software, 2015. **67**(1): p. 1-48.
  31. Buuren van, S. and K. Groothuis-Oudshoorn, *MICE: Multivariate Imputation by Chained Equations in R*. J Stat Soft, 2011. **45**(3): p. 1-67.
  32. Stekhoven, D.J. and P. Buhlmann, *MissForest--non-parametric missing value imputation for mixed-type data*. Bioinformatics, 2012. **28**(1): p. 112-8.
  33. Kuhn, M., *Building predictive models in R using the caret Package*. J Stat Software, 2008. **28**(5): p. 1-26.

## Figures legend

*Figure 1: Overview of the study*

*Figure 2: Schematic representation of the principles of the conventional SARS-CoV-2 RT-PCR (route 1) in comparison to the viability-PCR (route 2). Route 1: all RNA is isolated from the sample and amplified using RT-PCR. Route 2: PMA irreversibly binds to free RNA and RNA from non-intact virus particles. Only RNA from intact virus particles is isolated and amplified by RT-PCR.*

1  
2  
3  
4  
5  
6  
7  
8  
9  
10  
11  
12  
13  
14  
15  
16  
17  
18  
19  
20  
21  
22  
23  
24  
25  
26  
27  
28  
29  
30  
31  
32  
33  
34  
35  
36  
37  
38  
39  
40  
41  
42  
43  
44  
45  
46  
47  
48  
49  
50  
51  
52  
53  
54  
55  
56  
57  
58  
59  
60

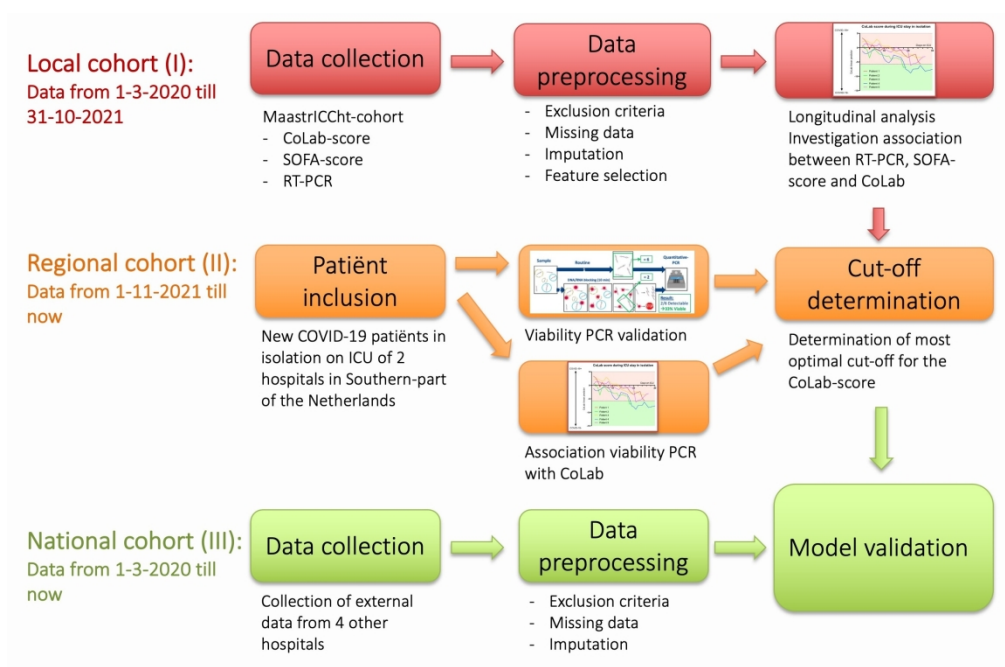

237x156mm (284 x 284 DPI)

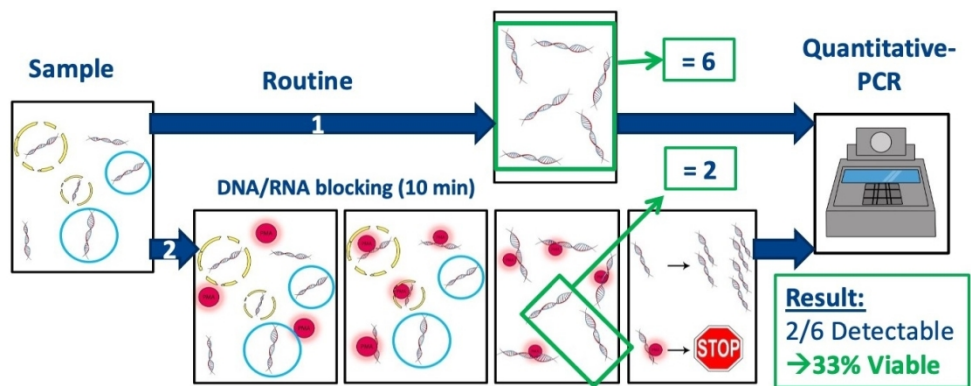

252x100mm (142 x 142 DPI)

## Supplemental

Supplemental Table 1. Overview of the hospitals participating in the study

| Hospital                  | Location                                 | Type of hospital          | ICU beds* | Hospital beds | Cohort  |
|---------------------------|------------------------------------------|---------------------------|-----------|---------------|---------|
| Maastricht UMC+           | Maastricht, the Netherlands              | University medical centre | 33        | 715           | I & III |
| Zuyderland MC             | Sittard-Geleen, Heerlen, the Netherlands | Large teaching hospital   | 36        | 980           | II      |
| Leiden UMC                | Leiden, the Netherlands                  | University medical centre | 45        | 882           | III     |
| Radboud UMC               | Nijmegen, the Netherlands                | University medical centre | 35        | 1.065         | III     |
| Medical Centre Leeuwarden | Leeuwarden, the Netherlands              | Large teaching hospital   | 39        | 647           | III     |
| Catharina Hospital        | Eindhoven, the Netherlands               | Large teaching hospital   | 36        | 696           | III     |

\*non-pandemic situation; UMC= university medical centre

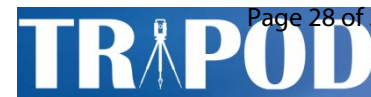

## TRIPOD Checklist: Prediction Model Development and Validation

| Section/Topic                | Item | Checklist Item | Page                                                                                                                                                                                                  |        |
|------------------------------|------|----------------|-------------------------------------------------------------------------------------------------------------------------------------------------------------------------------------------------------|--------|
| <b>Title and abstract</b>    |      |                |                                                                                                                                                                                                       |        |
| Title                        | 1    | D;V            | Identify the study as developing and/or validating a multivariable prediction model, the target population, and the outcome to be predicted.                                                          | P1     |
| Abstract                     | 2    | D;V            | Provide a summary of objectives, study design, setting, participants, sample size, predictors, outcome, statistical analysis, results, and conclusions.                                               | P3     |
| <b>Introduction</b>          |      |                |                                                                                                                                                                                                       |        |
| Background and objectives    | 3a   | D;V            | Explain the medical context (including whether diagnostic or prognostic) and rationale for developing or validating the multivariable prediction model, including references to existing models.      | P5     |
|                              | 3b   | D;V            | Specify the objectives, including whether the study describes the development or validation of the model or both.                                                                                     | P5/6   |
| <b>Methods</b>               |      |                |                                                                                                                                                                                                       |        |
| Source of data               | 4a   | D;V            | Describe the study design or source of data (e.g., randomized trial, cohort, or registry data), separately for the development and validation data sets, if applicable.                               | P6/7   |
|                              | 4b   | D;V            | Specify the key study dates, including start of accrual; end of accrual; and, if applicable, end of follow-up.                                                                                        | P6/7   |
| Participants                 | 5a   | D;V            | Specify key elements of the study setting (e.g., primary care, secondary care, general population) including number and location of centres.                                                          | P6/7   |
|                              | 5b   | D;V            | Describe eligibility criteria for participants.                                                                                                                                                       | P8     |
|                              | 5c   | D;V            | Give details of treatments received, if relevant.                                                                                                                                                     | n/a    |
| Outcome                      | 6a   | D;V            | Clearly define the outcome that is predicted by the prediction model, including how and when assessed.                                                                                                | P10    |
|                              | 6b   | D;V            | Report any actions to blind assessment of the outcome to be predicted.                                                                                                                                | n/a    |
| Predictors                   | 7a   | D;V            | Clearly define all predictors used in developing or validating the multivariable prediction model, including how and when they were measured.                                                         | P10    |
|                              | 7b   | D;V            | Report any actions to blind assessment of predictors for the outcome and other predictors.                                                                                                            | n/a    |
| Sample size                  | 8    | D;V            | Explain how the study size was arrived at.                                                                                                                                                            | P12    |
| Missing data                 | 9    | D;V            | Describe how missing data were handled (e.g., complete-case analysis, single imputation, multiple imputation) with details of any imputation method.                                                  | P11/12 |
| Statistical analysis methods | 10a  | D              | Describe how predictors were handled in the analyses.                                                                                                                                                 | P11/12 |
|                              | 10b  | D              | Specify type of model, all model-building procedures (including any predictor selection), and method for internal validation.                                                                         | P11/12 |
|                              | 10c  | V              | For validation, describe how the predictions were calculated.                                                                                                                                         | P12    |
|                              | 10d  | D;V            | Specify all measures used to assess model performance and, if relevant, to compare multiple models.                                                                                                   | P12    |
|                              | 10e  | V              | Describe any model updating (e.g., recalibration) arising from the validation, if done.                                                                                                               | P12    |
| Risk groups                  | 11   | D;V            | Provide details on how risk groups were created, if done.                                                                                                                                             | P8     |
| Development vs. validation   | 12   | V              | For validation, identify any differences from the development data in setting, eligibility criteria, outcome, and predictors.                                                                         | P12    |
| <b>Results</b>               |      |                |                                                                                                                                                                                                       |        |
| Participants                 | 13a  | D;V            | Describe the flow of participants through the study, including the number of participants with and without the outcome and, if applicable, a summary of the follow-up time. A diagram may be helpful. | n/a    |
|                              | 13b  | D;V            | Describe the characteristics of the participants (basic demographics, clinical features, available predictors), including the number of participants with missing data for predictors and outcome.    | n/a    |
|                              | 13c  | V              | For validation, show a comparison with the development data of the distribution of important variables (demographics, predictors and outcome).                                                        | n/a    |
| Model development            | 14a  | D              | Specify the number of participants and outcome events in each analysis.                                                                                                                               | n/a    |
|                              | 14b  | D              | If done, report the unadjusted association between each candidate predictor and outcome.                                                                                                              | n/a    |
| Model specification          | 15a  | D              | Present the full prediction model to allow predictions for individuals (i.e., all regression coefficients, and model intercept or baseline survival at a given time point).                           | n/a    |
|                              | 15b  | D              | Explain how to use the prediction model.                                                                                                                                                              | n/a    |
| Model performance            | 16   | D;V            | Report performance measures (with CIs) for the prediction model.                                                                                                                                      | n/a    |
| Model-updating               | 17   | V              | If done, report the results from any model updating (i.e., model specification, model performance).                                                                                                   | n/a    |
| <b>Discussion</b>            |      |                |                                                                                                                                                                                                       |        |
| Limitations                  | 18   | D;V            | Discuss any limitations of the study (such as nonrepresentative sample, few events per predictor, missing data).                                                                                      | n/a    |
| Interpretation               | 19a  | V              | For validation, discuss the results with reference to performance in the development data, and any other validation data.                                                                             | n/a    |
|                              | 19b  | D;V            | Give an overall interpretation of the results, considering objectives, limitations, results from similar studies, and other relevant evidence.                                                        | n/a    |
| Implications                 | 20   | D;V            | Discuss the potential clinical use of the model and implications for future research.                                                                                                                 | n/a    |
| <b>Other information</b>     |      |                |                                                                                                                                                                                                       |        |
| Supplementary information    | 21   | D;V            | Provide information about the availability of supplementary resources, such as study protocol, Web calculator, and data sets.                                                                         | n/a    |
| Funding                      | 22   | D;V            | Give the source of funding and the role of the funders for the present study.                                                                                                                         | P13    |

\*Items relevant only to the development of a prediction model are denoted by D, items relating solely to a validation of a prediction model are denoted by V, and items relating to both are denoted D;V. We recommend using the TRIPOD Checklist in conjunction with the TRIPOD Explanation and Elaboration document.

STROBE Statement—Checklist of items that should be included in reports of *cohort studies*

|                              | Item No | Recommendation                                                                                                                                                                                                                                                                                                         | Page No                               |
|------------------------------|---------|------------------------------------------------------------------------------------------------------------------------------------------------------------------------------------------------------------------------------------------------------------------------------------------------------------------------|---------------------------------------|
| <b>Title and abstract</b>    | 1       | (a) Indicate the study's design with a commonly used term in the title or the abstract<br>(b) Provide in the abstract an informative and balanced summary of what was done and what was found                                                                                                                          | P1<br>P3                              |
| <b>Introduction</b>          |         |                                                                                                                                                                                                                                                                                                                        |                                       |
| Background/rationale         | 2       | Explain the scientific background and rationale for the investigation being reported                                                                                                                                                                                                                                   | P5                                    |
| Objectives                   | 3       | State specific objectives, including any prespecified hypotheses                                                                                                                                                                                                                                                       | P6                                    |
| <b>Methods</b>               |         |                                                                                                                                                                                                                                                                                                                        |                                       |
| Study design                 | 4       | Present key elements of study design early in the paper                                                                                                                                                                                                                                                                | P6                                    |
| Setting                      | 5       | Describe the setting, locations, and relevant dates, including periods of recruitment, exposure, follow-up, and data collection                                                                                                                                                                                        | P8                                    |
| Participants                 | 6       | (a) Give the eligibility criteria, and the sources and methods of selection of participants. Describe methods of follow-up<br>(b) For matched studies, give matching criteria and number of exposed and unexposed                                                                                                      | P8<br>n/a                             |
| Variables                    | 7       | Clearly define all outcomes, exposures, predictors, potential confounders, and effect modifiers. Give diagnostic criteria, if applicable                                                                                                                                                                               | P10                                   |
| Data sources/<br>measurement | 8*      | For each variable of interest, give sources of data and details of methods of assessment (measurement). Describe comparability of assessment methods if there is more than one group                                                                                                                                   | P9/11                                 |
| Bias                         | 9       | Describe any efforts to address potential sources of bias                                                                                                                                                                                                                                                              | t.b.d.                                |
| Study size                   | 10      | Explain how the study size was arrived at                                                                                                                                                                                                                                                                              | P12                                   |
| Quantitative variables       | 11      | Explain how quantitative variables were handled in the analyses. If applicable, describe which groupings were chosen and why                                                                                                                                                                                           | P11/12                                |
| Statistical methods          | 12      | (a) Describe all statistical methods, including those used to control for confounding<br>(b) Describe any methods used to examine subgroups and interactions<br>(c) Explain how missing data were addressed<br>(d) If applicable, explain how loss to follow-up was addressed<br>(e) Describe any sensitivity analyses | P11/12<br>P10/11<br>P12<br>n/a<br>P11 |
| <b>Results</b>               |         |                                                                                                                                                                                                                                                                                                                        |                                       |
| Participants                 | 13*     | (a) Report numbers of individuals at each stage of study—eg numbers potentially eligible, examined for eligibility, confirmed eligible, included in the study, completing follow-up, and analysed<br>(b) Give reasons for non-participation at each stage<br>(c) Consider use of a flow diagram                        | Not present in protocol paper         |
| Descriptive data             | 14*     | (a) Give characteristics of study participants (eg demographic, clinical, social) and information on exposures and potential confounders<br>(b) Indicate number of participants with missing data for each variable of interest                                                                                        | Not present in protocol paper         |

1  
2  
3  
4  
5  
6  
7  
8  
9  
10  
11  
12  
13  
14  
15  
16  
17  
18  
19  
20  
21  
22  
23  
24  
25  
26  
27  
28  
29  
30  
31  
32  
33  
34  
35  
36  
37  
38  
39  
40  
41  
42  
43  
44  
45  
46  
47  
48  
49  
50  
51  
52  
53  
54  
55  
56  
57  
58  
59  
60

(c) Summarise follow-up time (eg, average and total amount)

|              |     |                                                                |                               |
|--------------|-----|----------------------------------------------------------------|-------------------------------|
| Outcome data | 15* | Report numbers of outcome events or summary measures over time | Not present in protocol paper |
|--------------|-----|----------------------------------------------------------------|-------------------------------|

For peer review only



|                                           |                  |    |                                                                                                                                                                                                                                                                                                                                                                                                                   |                               |
|-------------------------------------------|------------------|----|-------------------------------------------------------------------------------------------------------------------------------------------------------------------------------------------------------------------------------------------------------------------------------------------------------------------------------------------------------------------------------------------------------------------|-------------------------------|
| 1<br>2<br>3<br>4<br>5<br>6<br>7<br>8<br>9 | Main results     | 16 | (a) Give unadjusted estimates and, if applicable, confounder-adjusted estimates and their precision (eg, 95% confidence interval). Make clear which confounders were adjusted for and why they were included<br><br>(b) Report category boundaries when continuous variables were categorized<br>(c) If relevant, consider translating estimates of relative risk into absolute risk for a meaningful time period | Not present in protocol paper |
| 10<br>11<br>12<br>13<br>14                | Other analyses   | 17 | Report other analyses done—eg analyses of subgroups and interactions, and sensitivity analyses                                                                                                                                                                                                                                                                                                                    | Not present in protocol paper |
| <b>Discussion</b>                         |                  |    |                                                                                                                                                                                                                                                                                                                                                                                                                   |                               |
| 15<br>16<br>17<br>18<br>19<br>20          | Key results      | 18 | Summarise key results with reference to study objectives                                                                                                                                                                                                                                                                                                                                                          | Not present in protocol paper |
| 21<br>22<br>23                            | Limitations      | 19 | Discuss limitations of the study, taking into account sources of potential bias or imprecision. Discuss both direction and magnitude of any potential bias                                                                                                                                                                                                                                                        | P2                            |
| 24<br>25<br>26<br>27                      | Interpretation   | 20 | Give a cautious overall interpretation of results considering objectives, limitations, multiplicity of analyses, results from similar studies, and other relevant evidence                                                                                                                                                                                                                                        | Not present in protocol paper |
| 28<br>29<br>30<br>31<br>32                | Generalisability | 21 | Discuss the generalisability (external validity) of the study results                                                                                                                                                                                                                                                                                                                                             | Not present in protocol paper |
| <b>Other information</b>                  |                  |    |                                                                                                                                                                                                                                                                                                                                                                                                                   |                               |
| 33<br>34<br>35<br>36<br>37                | Funding          | 22 | Give the source of funding and the role of the funders for the present study and, if applicable, for the original study on which the present article is based                                                                                                                                                                                                                                                     | P13                           |

\*Give information separately for exposed and unexposed groups.

**Note:** An Explanation and Elaboration article discusses each checklist item and gives methodological background and published examples of transparent reporting. The STROBE checklist is best used in conjunction with this article (freely available on the Web sites of PLoS Medicine at <http://www.plosmedicine.org/>, Annals of Internal Medicine at <http://www.annals.org/>, and Epidemiology at <http://www.epidem.com/>). Information on the STROBE Initiative is available at <http://www.strobe-statement.org>.
