# Supplementary material for: Validating a clinical laboratory parameter-based deisolation algorithm for patients with COVID-19 in the intensive care unit using viability PCR: the CoLaIC multicentre cohort study protocol
Source: PubMed Central journal article supplement — BMJ Open. 2023 Feb 28;13(2):e069455. doi: 10.1136/bmjopen-2022-069455 (PMC9979582; doi:10.1136/bmjopen-2022-069455), 2023-02-28
Supplement: bmjopen-2022-069455supp001.pdf [file bmjopen-2022-069455supp001.pdf]

## Supplemental

Supplemental Table 1. Overview of the hospitals participating in the study

| Hospital                     | Location                                 | Type of hospital          | ICU beds* | Hospital beds | Cohort  |
|------------------------------|------------------------------------------|---------------------------|-----------|---------------|---------|
| Maastricht UMC+              | Maastricht, the Netherlands              | University medical centre | 33        | 715           | I & III |
| Zuyderland MC                | Sittard-Geleen, Heerlen, the Netherlands | Large teaching hospital   | 36        | 980           | II      |
| Leiden UMC                   | Leiden, the Netherlands                  | University medical centre | 45        | 882           | III     |
| Radboud UMC                  | Nijmegen, the Netherlands                | University medical centre | 35        | 1.065         | III     |
| Medical Centre<br>Leeuwarden | Leeuwarden, the Netherlands              | Large teaching hospital   | 39        | 647           | III     |
| Catharina Hospital           | Eindhoven, the Netherlands               | Large teaching hospital   | 36        | 696           | III     |

\*non-pandemic situation; UMC= university medical centre
